# Supplementary material for: Delaminated MBene sheets beyond usual 2D transition metal materials for securing Pt single atoms to boost hydrogen evolution
Source: Royal Society of Chemistry journal article supplement (doi:10.1039/d3ee01314f), 2023-01-01
Supplement: d3ee01314f1.pdf [file d3ee01314f1.pdf]

## Supporting Information

### **Delaminated MBene Sheets Beyond Usual 2D Transition Metal Materials for Securing Pt Single Atoms to Boost Hydrogen Evolution**

Seok Ju Park<sup>a</sup>, Thanh Hai Nguyen<sup>a</sup>, Duy Thanh Tran<sup>a</sup>, Van An Dinh<sup>b</sup>, Nam Hoon Kim<sup>a</sup>, Joong Hee Lee<sup>a,c\*</sup>

<sup>a</sup>Department of Nano Convergence Engineering, Jeonbuk National University, Jeonju, Jeonbuk, 54896, Republic of Korea.

<sup>b</sup>Department of Precision Engineering, Graduate School of Engineering, Osaka University, 2-1, Yamada-oka, Suita, Osaka 565-0871, Japan.

<sup>c</sup>Carbon Composite Research Center, Department of Polymer-Nano Science and Technology, Jeonbuk National University, Jeonju, Jeonbuk, 54896, Republic of Korea.

#### **Chemical materials**

All the chemicals and reagents were commercially available and used directly without further purification. MoAlB phase powder (400 mesh) was purchased from Laizhou Kai Kai Ceramic Materials Co., Ltd (China). Sulfuric acid (H<sub>2</sub>SO<sub>4</sub>, 95%), potassium hexachloroplatinate (K<sub>2</sub>PtCl<sub>6</sub>, 99%), L-Ascorbic acid (C<sub>6</sub>H<sub>8</sub>O<sub>6</sub>, 99%), tetramethylammonium hydroxide (TMAOH) ((CH<sub>3</sub>)<sub>4</sub>N(OH), 25wt% in H<sub>2</sub>O), and molybdenum carbide powder (Mo<sub>2</sub>C, 325 mesh, 99.5%) were obtained from Sigma-Aldrich. Sodium hydroxide (NaOH, 98%), potassium hydroxide (KOH, 85%), and 2-Propanol (C<sub>3</sub>H<sub>7</sub>OH, 99.9%) were provided from Samchun Chemical Co. (Korea). Nanocrystalline powder of molybdenum (IV) sulfide sheet (MoS<sub>2</sub>, 325 mesh, 99 %) was provided from Alfa Aesar Co. (USA).

#### **Structural characterization**

The field-emission scanning electron microscopy (FE-SEM) on a GeminiSEM 500 instrument (Zeiss, Germany) and transmission electron microscopy (TEM) on a JEM-ARM200F instrument (JEOL Ltd., Japan) were used to probe morphology and micro/nano/atomic-scale structure of the synthesized materials. The valance state and chemical composition were investigated by conducting X-ray photoelectron spectroscopy (XPS) on a Theta Probe instrument (Thermo Fisher Scientific Inc., USA) at the KBSI center, Jeonju. Specific surface area and porosity of the synthesized materials were measured by using an ASAP 2020 Plus system (Micromeritics Instrument Co., USA). Crystalline features of the synthesized materials were investigated by X-ray diffraction (XRD) via a D/Max 2500 V/Pc instrument (Rigaku Co., Japan). Chemical properties of the synthesized materials were examined by a micro-Raman spectrum of RAMANtouchlaser analysis system with excitation  $\lambda = 532$  nm (Nanophoton Co., Japan) and XAS analysis on a Rigaku R-XAS instrument (Rigaku Co. Japan) with an accelerated voltage/Current of 10 kV/50 mA. The metal content of the synthesized materials was assessed by analytical technique of inductively coupled plasma-optical emission spectroscopy (ICP-OES) via an iCAP 7400 Duo instrument (Thermo Fisher Scientific Co., USA).

### **Electrochemical measurement**

All electrochemical measurements were studied in a three-electrode electrochemical cell integrated with a CHI660D system manufactured by CH Instruments Inc. (USA). A graphite rod and Ag/AgCl (saturated KCl) were employed as counter and reference electrodes, respectively. The catalyst ink-coated Ni foam (NF) or carbon cloth (CC) was utilized as the working electrode in a 1.0 M KOH or 0.5 M H<sub>2</sub>SO<sub>4</sub> electrolyte. For preparing the working electrodes, a homogeneous catalyst ink was made by ultrasonication a mixture of active material (2.5 mg), carbon black (0.5 mg), IPA (750  $\mu$ L), and Nafion 5wt% (25  $\mu$ L) for 60 min.

The ink was then drop-casted on NF or CC, followed by naturally drying overnight. The catalytic activity of electrodes was measured by linear sweep voltammetry (LSV) taken at a slow scan rate of 5 mV s<sup>-1</sup> to minimize the capacitive contribution. The hetero charge transfer capability of electrode was measured by electrochemical impedance spectroscopy (EIS) in a frequency range from 10<sup>5</sup> to 10<sup>-2</sup> Hz at open circuit potential (OCP), shown in Table S1. For comparison, the electrodes of commercial Pt-C were also prepared in the same approach. All the measured potentials were converted to reversible hydrogen electrode by using the following equation.

$$E_{RHE} = E_{Ag/AgCl} + E_{Ag/AgCl}^0 + 0.0592 \times pH \quad (1)$$

### **Fabrication of anion exchange membrane water electrolyzer (AEMWE) single-cell and characterization**

The AEMWE single cell was constructed with an active area of 5 cm<sup>2</sup>. The Sustainion Anion Exchange Membrane (X37-50, Grade T) was used to separate the anode and cathode components, and they were immersed in a bath of 1.0 M KOH for 48 h to exchange chloride ions to hydroxide ions fully. The anode catalyst ink was prepared by mixing 40 mg of RuO<sub>2</sub> with 1.5 g of IPA:H<sub>2</sub>O (3:1, w/w) and 300 μL of Sustainion® XA-9 Alkaline Ionomer 5% in EtOH. The cathode catalyst ink was prepared by mixing 15 mg of Pt-MoAl<sub>1-x</sub>B with 5 mg of carbon black (CAS No: 133-86-4, Korea Carbon Black Co., Ltd), 1.5 g of IPA:H<sub>2</sub>O (3:1, w/w), and 300 μL of Sustainion® XA-9 Alkaline Ionomer 5% in EtOH. The anode and cathode inks were sonicated for 1.0 h in an iced bath and spray-coated on stainless-steel fiber paper (anode) and carbon cloth (cathode), respectively, using a hand-spray method with the assistance of air-spray gun. Afterward, the electrodes were moved to a vacuum oven for drying at 60 °C overnight. The catalyst loading was 5.0 and 3.0 mg cm<sup>-2</sup> at anode and cathode electrodes,

respectively. The  $I-V$  curves of the AEMWE cell were recorded in 1.0 M KOH at 60 °C by scanning current at a step rate of 5 mA using an in-house-produced water electrolyzer (Carbon and Fuelcell, Korea). The AEMWE cell durability was evaluated at a constant current density of 0.5 A cm<sup>-2</sup> at 60 °C. The electrolyte was circulated at a rate of 3 mL min<sup>-1</sup> through a peristaltic pump. The cell efficiency (%) of the AEMWE cell is calculated as follows:<sup>1,2</sup>

$$\text{Cell efficiency (\%)} = \frac{\text{Hydrogen power}}{\text{AEMWE power}} \times 100\% \quad (2)$$

Where hydrogen power ( $\frac{W}{cm^2}$ ) = hydrogen production rate  $\times$  lower heating value, and AEMWE power ( $\frac{W}{cm^2}$ ) = cell voltage  $\times$  cell current density. In this study, we assumed that the Faradic efficiency of hydrogen is 100 %, hence the hydrogen production rate is theoretically  $2.59 \times 10^{-6}$  mol H<sub>2</sub>/(cm<sup>2</sup>·s) at 0.5 A cm<sup>-2</sup>. A lower heating value is 24 200 J/mol.

### Density functional theory calculation

DFT studies were performed by using Vienna Ab initio Simulation Package (VASP) code.<sup>3,4</sup> The projector-augmented wave (PAW) method was employed to describe the interaction between electron and core.<sup>5</sup> The Perdew-Burke-Ernzerhof (PBE) functional within the generalized-gradient approximation (GGA) was utilized to describe the electron exchange correlation.<sup>6</sup> An energy cutoff of 500 eV was chosen for plane-wave basis set, and the  $\Gamma$ -centered k-point for all calculations was automatically generated by the value of 0.03 (unit of  $2\pi \text{ \AA}^{-1}$ ) by using VASPKIT.<sup>7</sup> The spin-polarization and Grimme's D3 scheme of vdW correction were considered in all calculations.<sup>8</sup> To avoid the self-interaction between their periodic images, a vacuum layer of 15 Å was added. During the structural relaxation, all atoms were freely moved until the convergence tolerance of force reached less than 0.02 eV Å<sup>-1</sup>. The



free energy was calculated by:

$$\Delta G = \Delta E + \Delta ZPE - T \Delta S \quad (3)$$

where  $\Delta E$  is the total energy difference. The  $\Delta ZPE$  and  $\Delta S$  are the change in zero-point energy and entropy, respectively. T is the temperature (298.15 K).

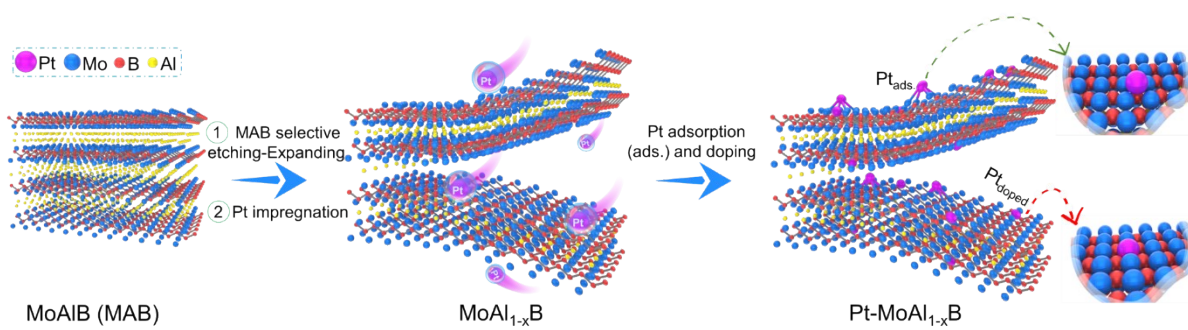

**Figure S1.** Schematic illustration for the fabrication of Pt–MoAl<sub>1-x</sub>B catalyst.

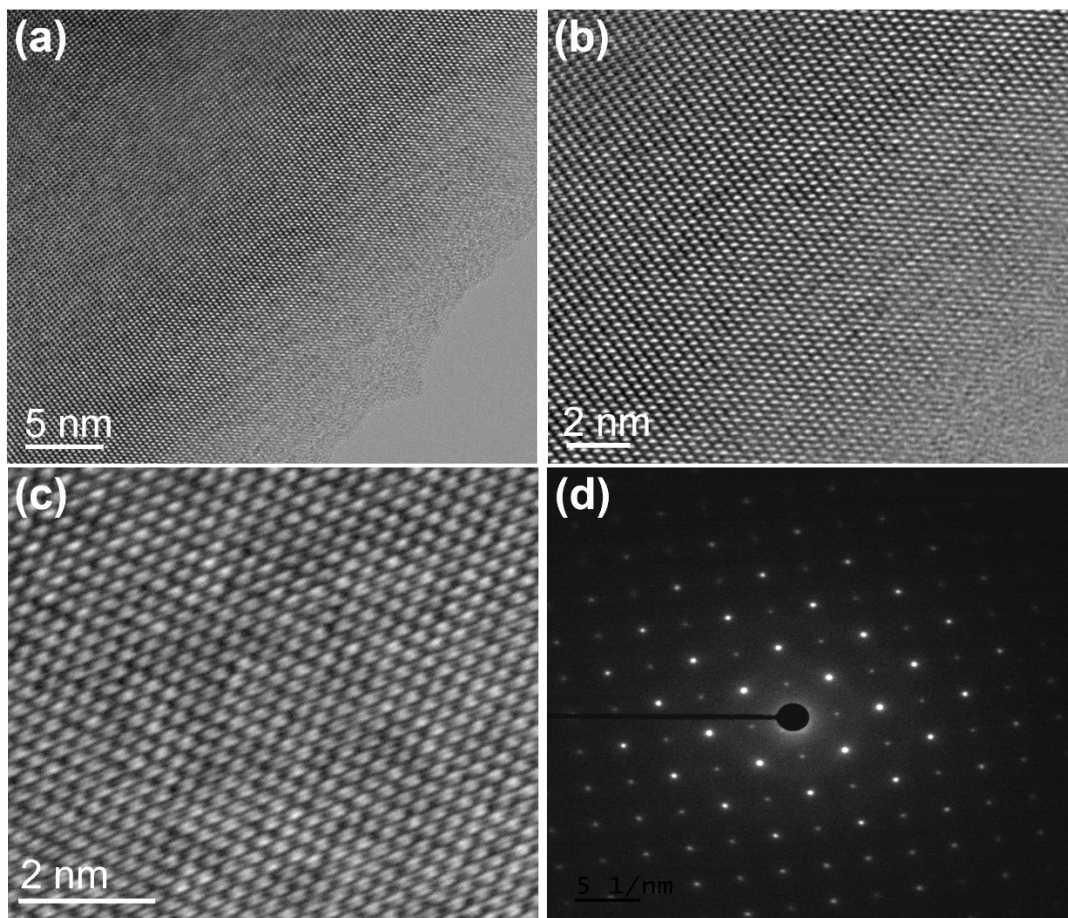

**Figure S2.** HR-TEM images and SAED spectrum of the MAB structure.

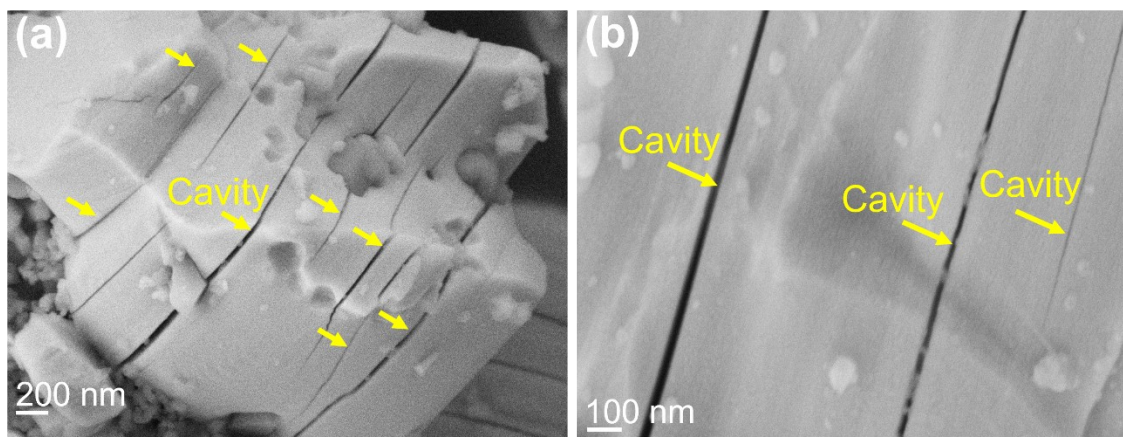

**Figure S3.** SEM image of MAB after alkaline treatment.

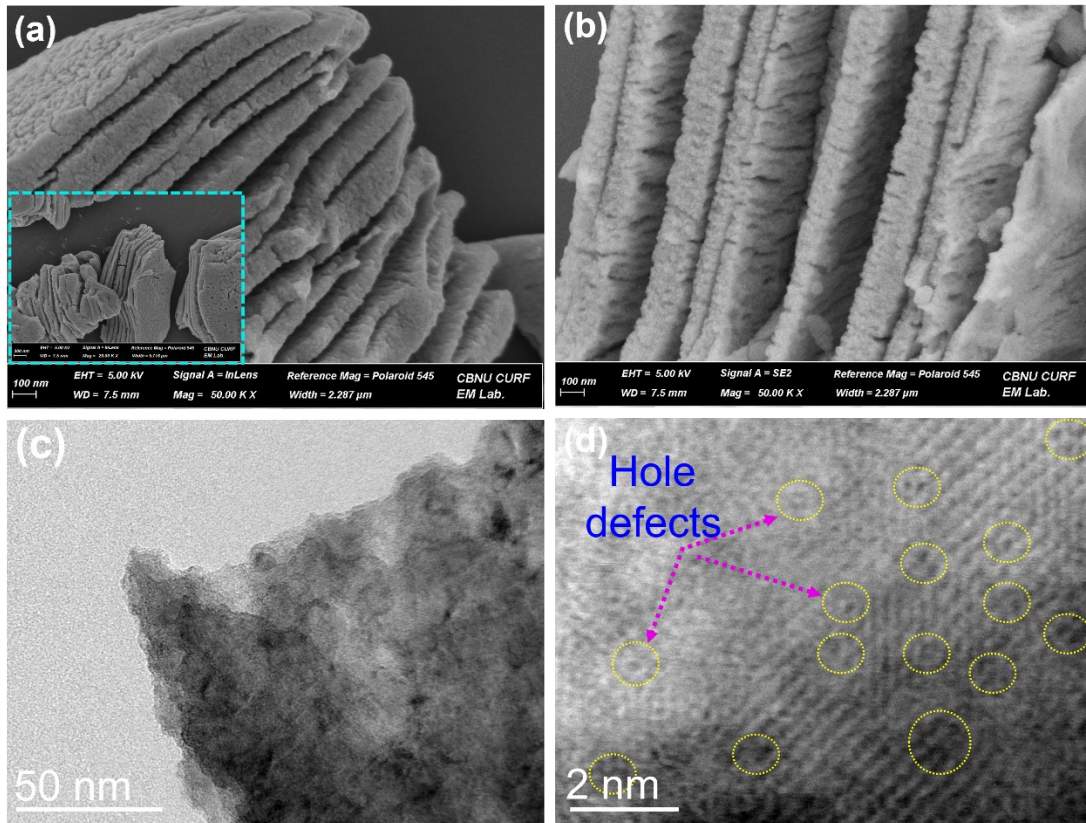

**Figure S4.** (a and b) SEM; (c) TEM and HR-TEM (d) images of MoAl<sub>1-x</sub>B material.

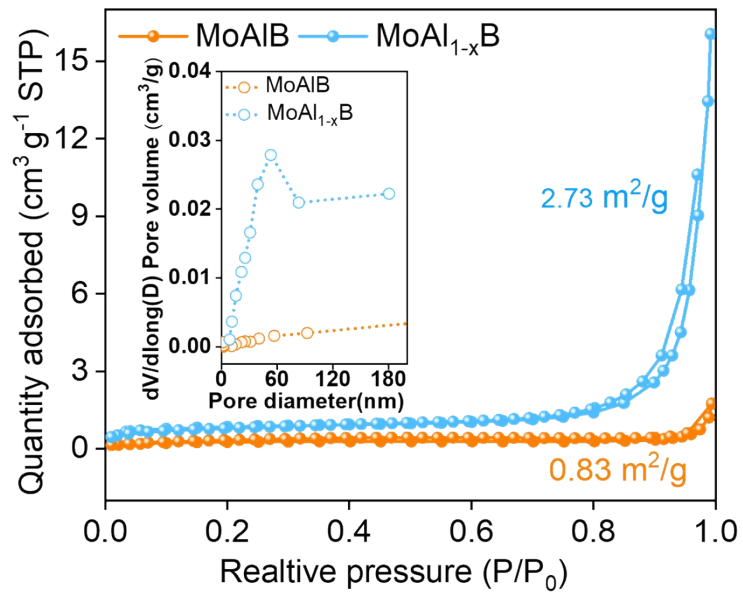

**Figure S5.** Nitrogen adsorption-desorption isotherms for bulk MAB and MoAl<sub>1-x</sub>B materials

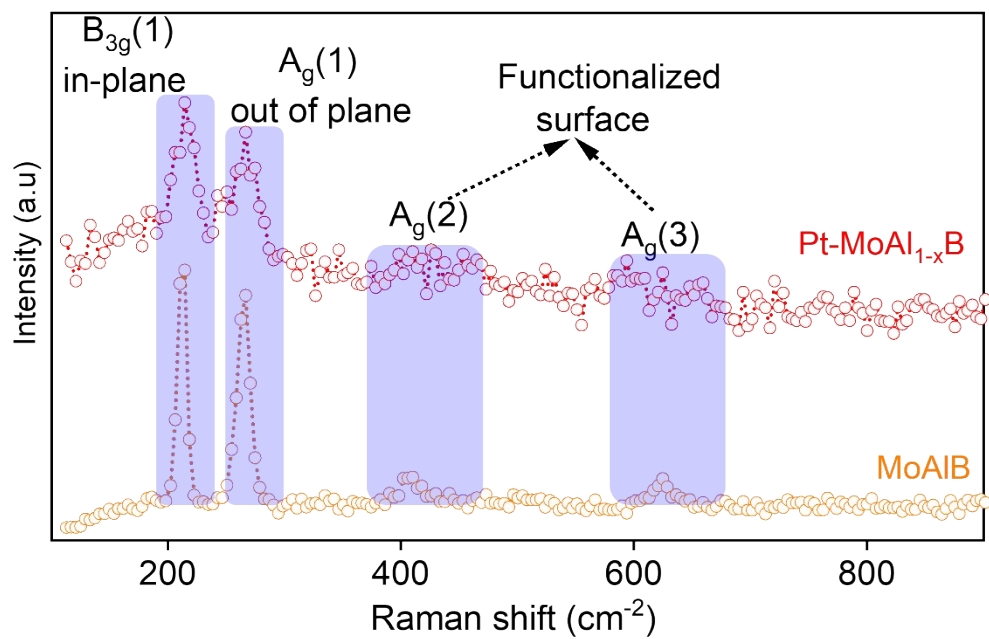

**Figure S6.** Raman spectra of the Pt-MoAl<sub>1-x</sub>B and MAIB materials.



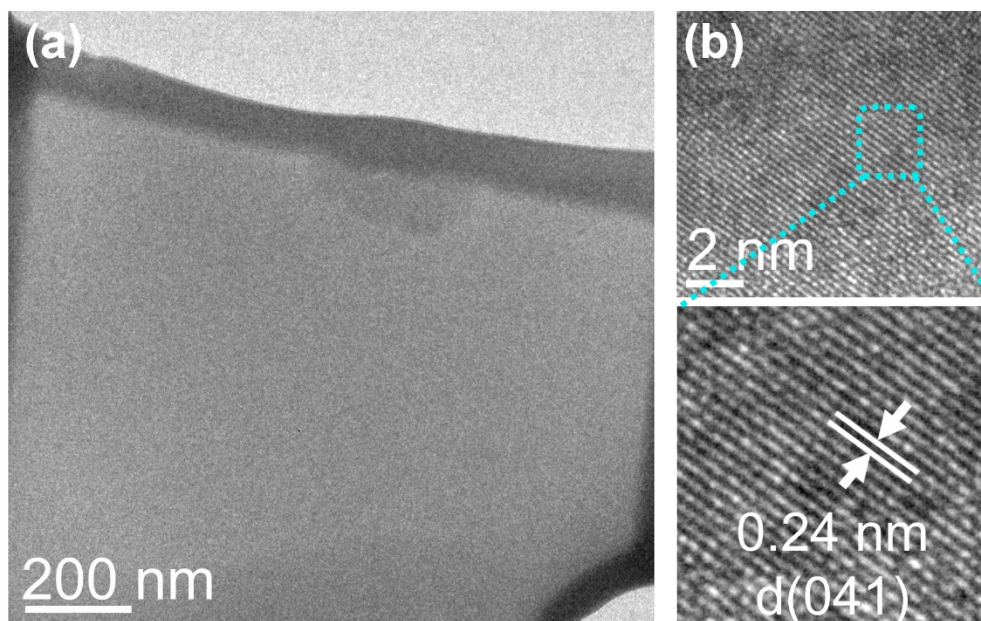

**Figure S7.** (a) TEM and (b) HR-TEM images of Pt-MoAl<sub>1-x</sub>B material.



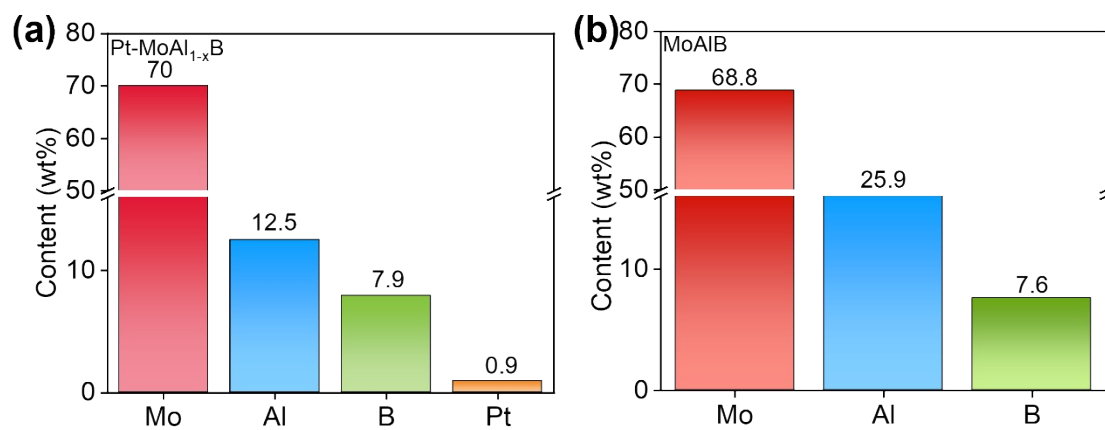

**Figure S8.** Element percentages of (a) Pt-MoAl<sub>1-x</sub>B and (b) MoAlB materials measured by ICP-OES.

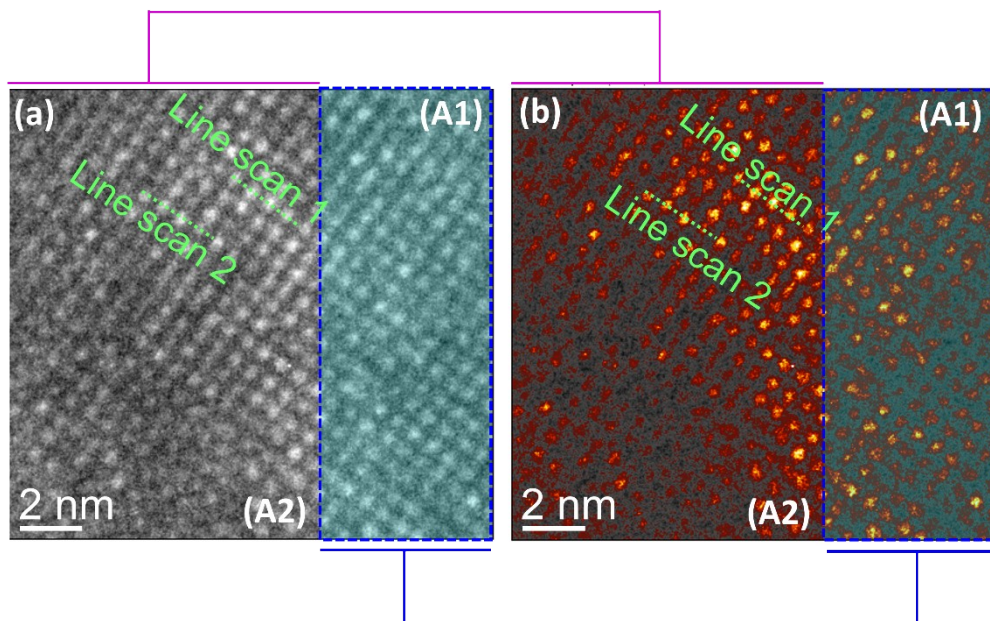

**Figure S9.** (a) HAADF-STEM image of Pt-MoAl<sub>1-x</sub>B material and (b) its corresponding false-color image.

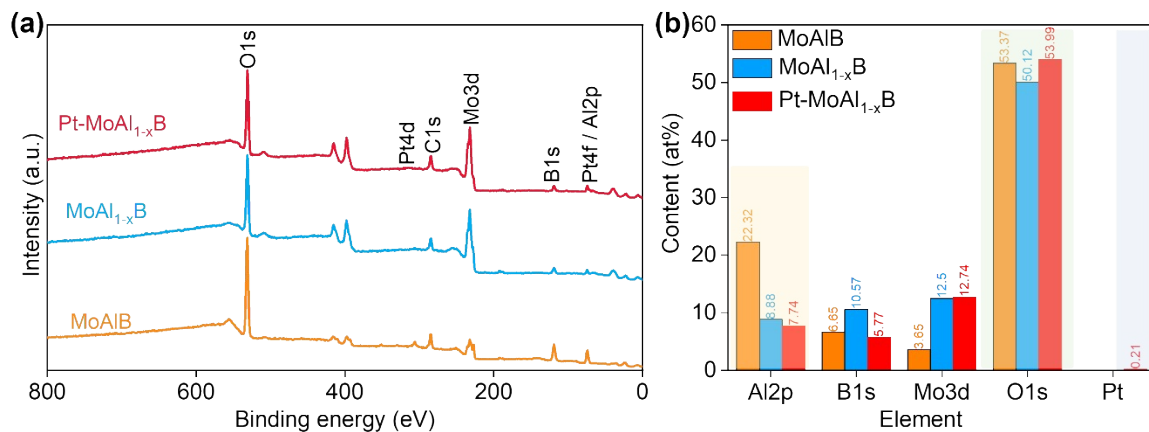

**Figure S10.** (a) XPS survey of Pt–MoAl<sub>1-x</sub>B, MoAl<sub>1-x</sub>B, and MoAlB materials; (b) Atomic percentage of Al2p, B1s, Mo3d, O1s, and Pt in Pt–MoAl<sub>1-x</sub>B, MoAl<sub>1-x</sub>B, and MoAlB materials.

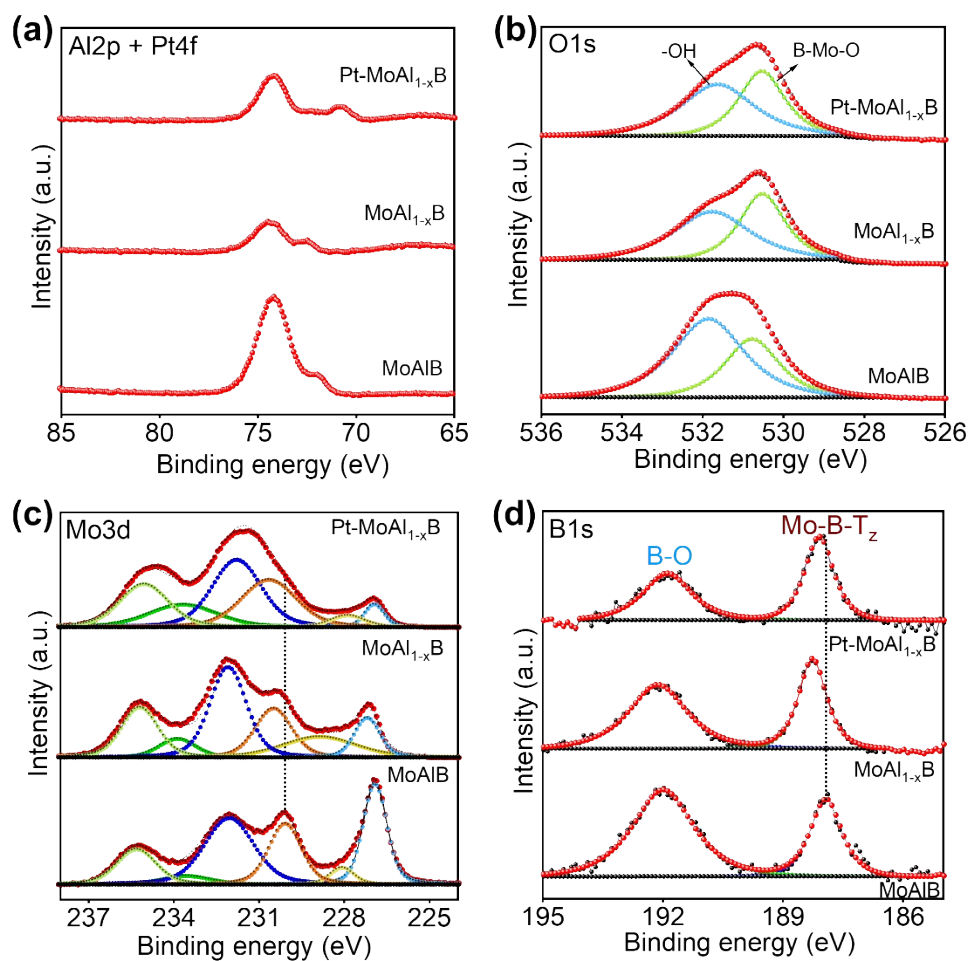

**Figure S11.** High resolution XPS spectra of (a) Al2p + Pt4f, (b) O1s, (c) Mo3d and (d) B1s in Pt-MoAl<sub>1-x</sub>B, MoAl<sub>1-x</sub>B, and MoAlB materials

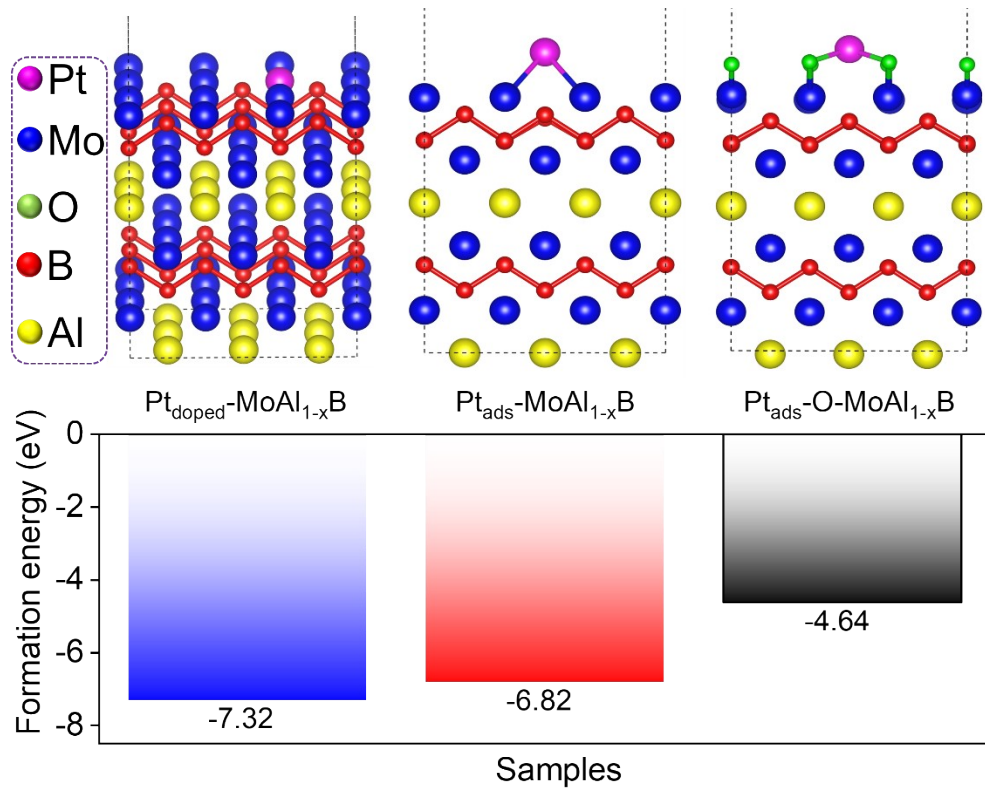

**Figure S12.** The formation energy for  $Pt_{doped}-MoAl_{1-x}B$ ,  $Pt_{ads.}-MoAl_{1-x}B$  (with the formation  $Pt_{ads.}-Mo$  interactions), and  $Pt_{ads.}-O-MoAl_{1-x}B$  (with the formation  $Pt_{ads.}-O$  interactions).

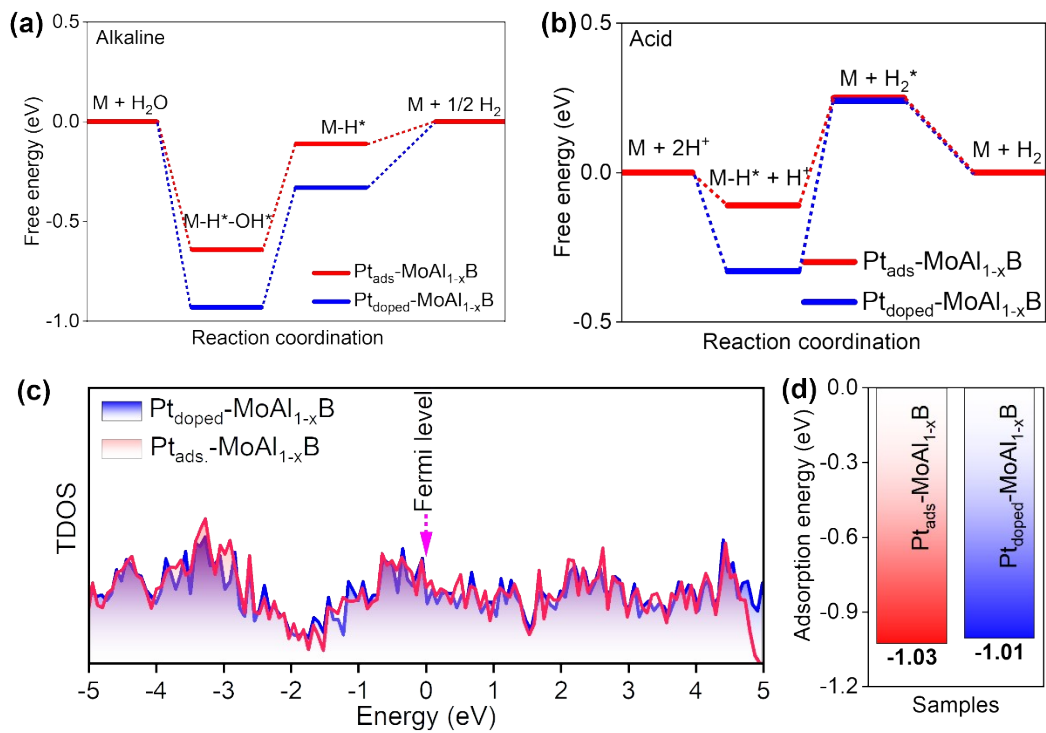

**Figure S13.** Gibbs free energy diagrams of  $\text{Pt}_{\text{doped}}\text{-MoAl}_{1-x}\text{B}$  and  $\text{Pt}_{\text{ads.}}\text{-MoAl}_{1-x}\text{B}$  for HER in (a) alkaline and (b) acid medium; (c) DOS and (d) water adsorption energy of  $\text{Pt}_{\text{doped}}\text{-MoAl}_{1-x}\text{B}$  and  $\text{Pt}_{\text{ads.}}\text{-MoAl}_{1-x}\text{B}$ .

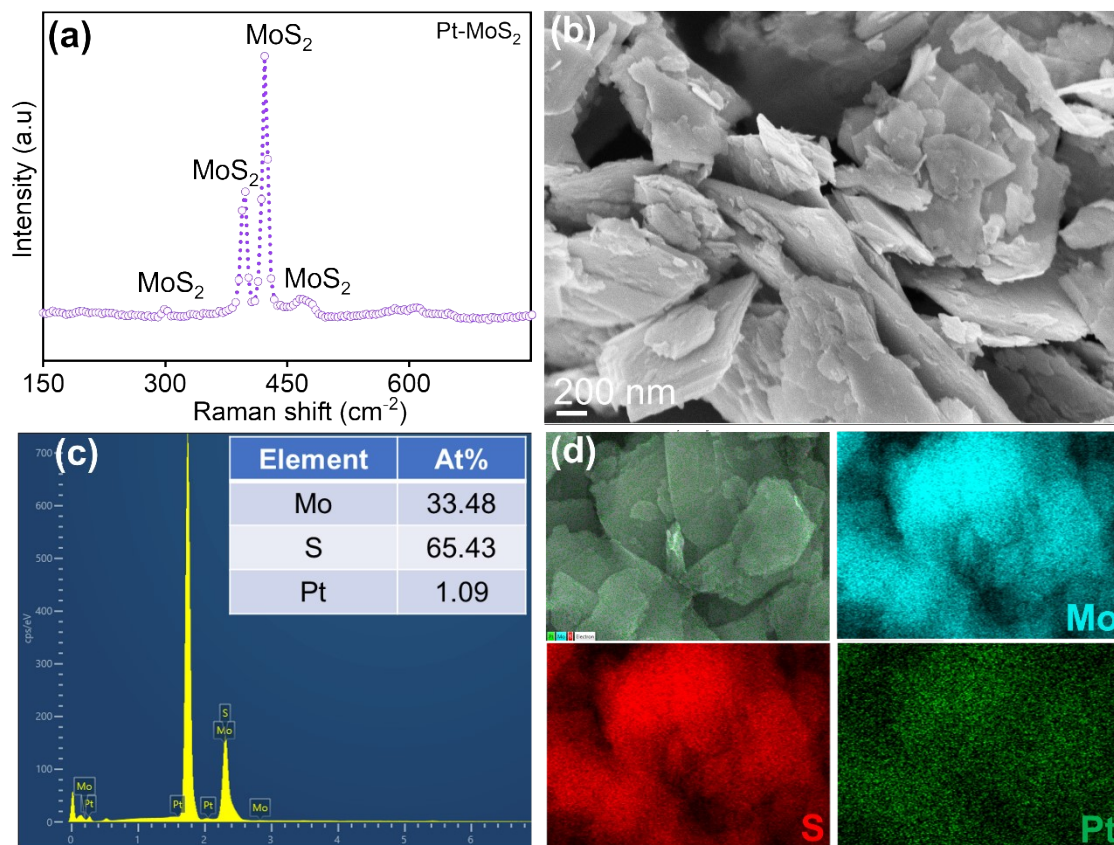

**Figure S14.** (a) Raman spectrum, (b) SEM image, and (c) EDS spectrum, and EDS mapping of Pt–MoS<sub>2</sub> material.

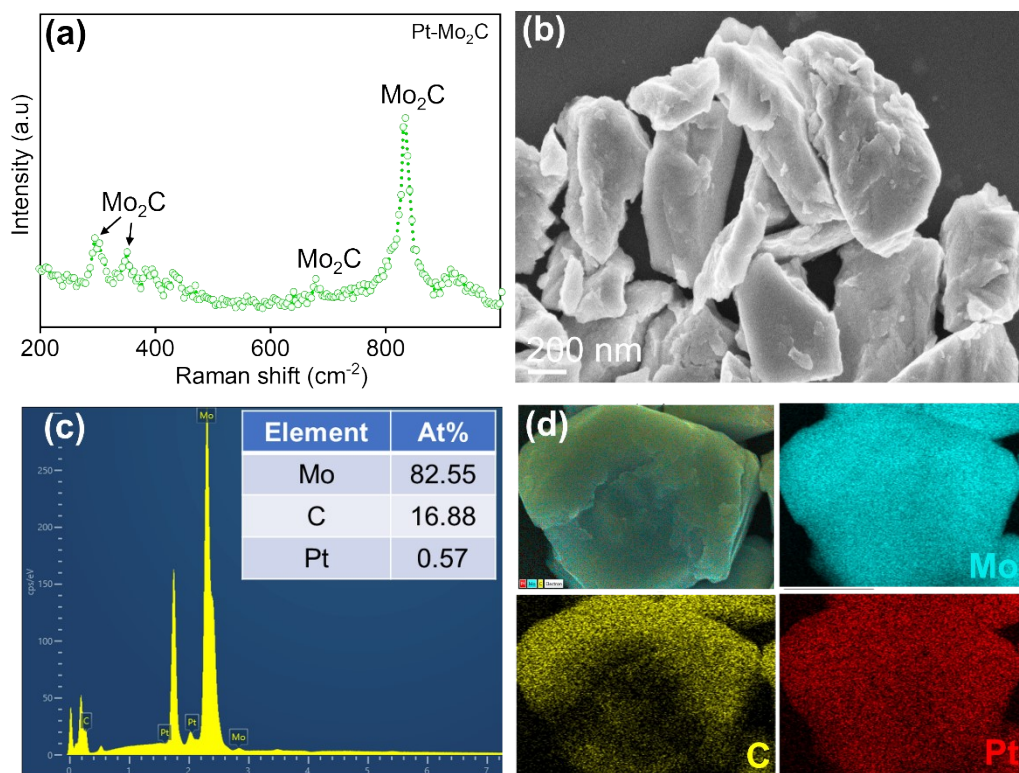

**Figure S15.** (a) Raman spectrum, (b) SEM image, and (c) EDS spectrum, and EDS mapping of Pt–Mo<sub>2</sub>C material.



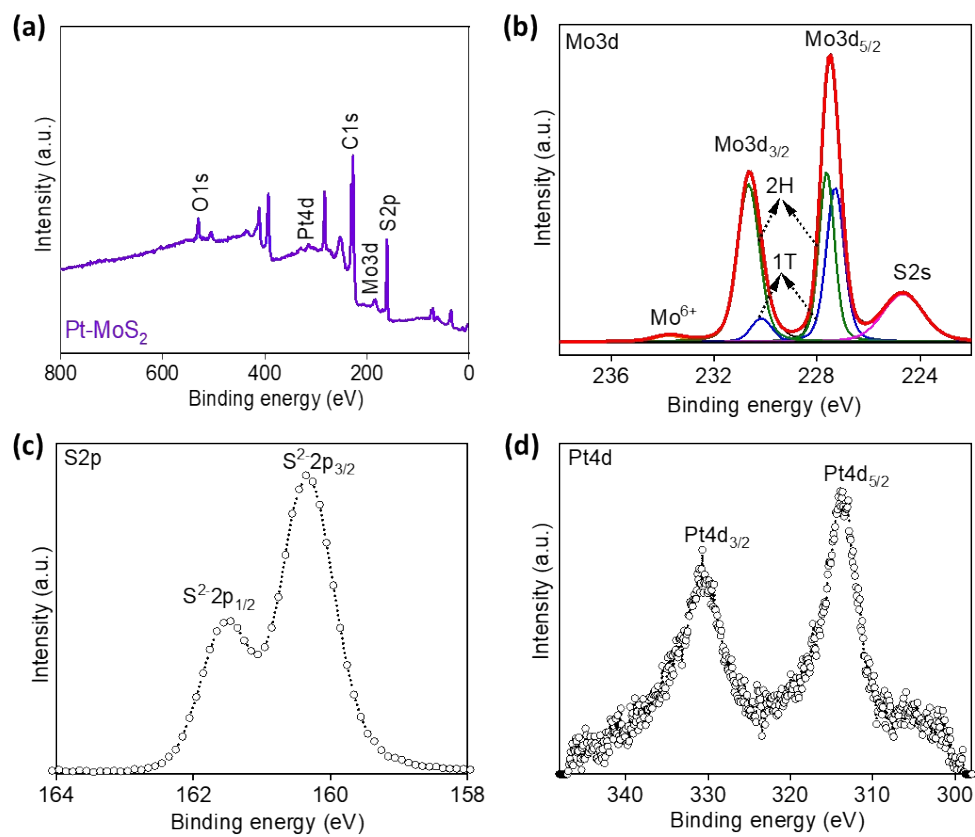

**Figure S16.** (a) XPS survey of Pt–MoS<sub>2</sub> material; High-resolution XPS spectra of (b) Mo3d, (c) S2p, and (d) Pt4d for Pt–MoS<sub>2</sub> material.

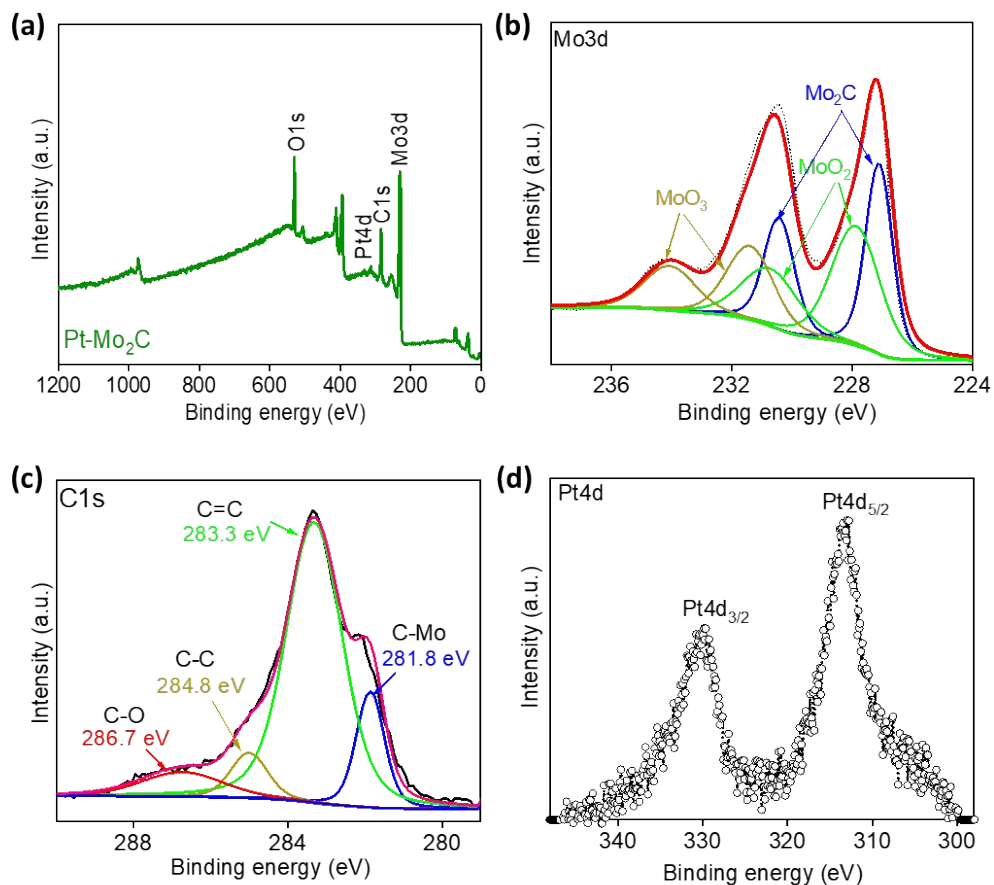

**Figure S17.** (a) XPS survey of Pt–Mo<sub>2</sub>C material; High-resolution XPS spectra of (b) Mo3d, (c) C1s, and (d) Pt4d for Pt–Mo<sub>2</sub>C material.

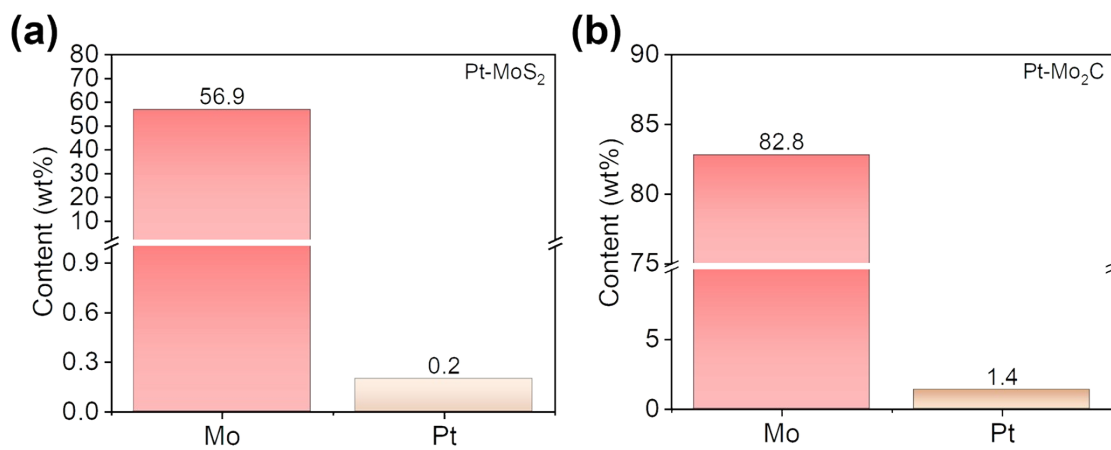

**Figure S18.** ICP-OES analysis for Pt content in (a) Pt-MoS<sub>2</sub> and (b) Pt-Mo<sub>2</sub>C catalysts.

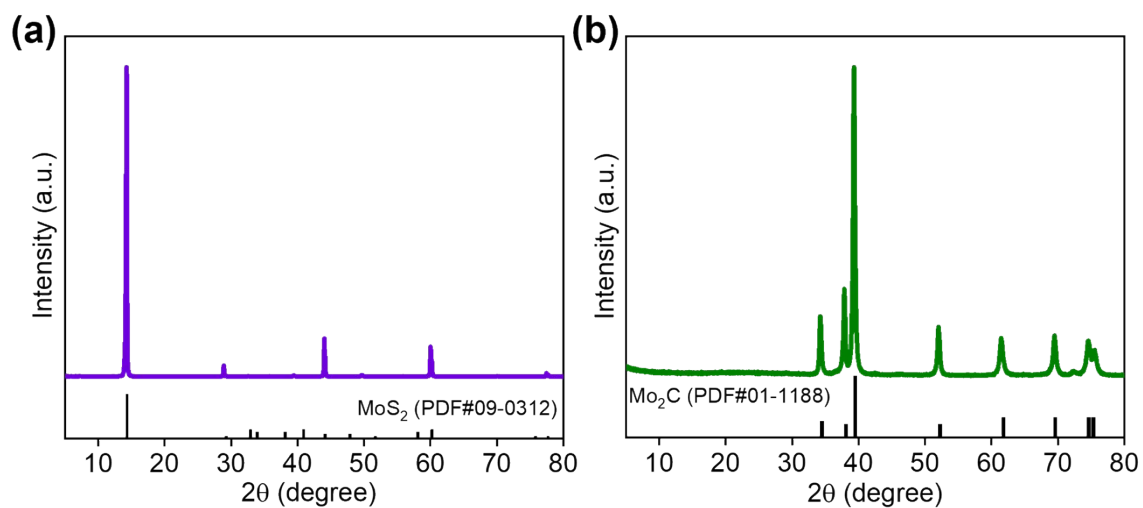

**Figure S19.** XRD patterns of (a) Pt-MoS<sub>2</sub> and (b) Pt-Mo<sub>2</sub>C catalysts.

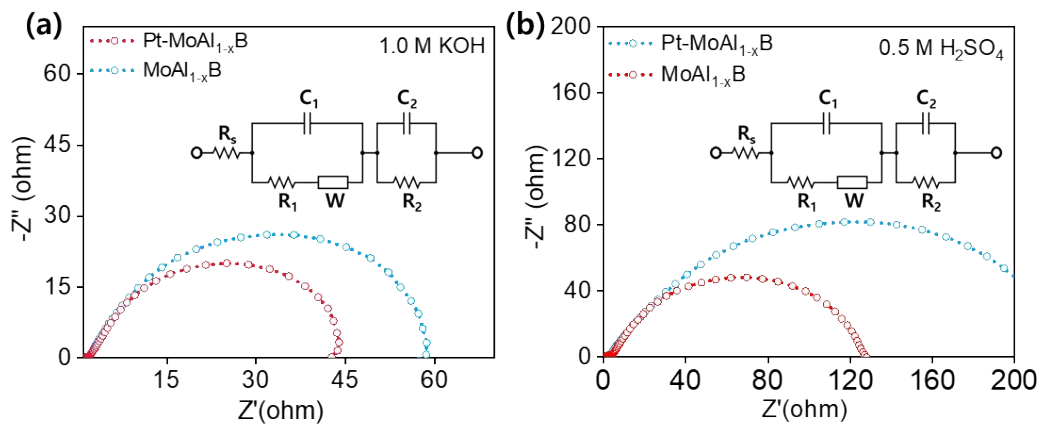

**Figure S20.** EIS measurements of MoAl<sub>1-x</sub>B and Pt-MoAl<sub>1-x</sub>B in (a) 1.0 M KOH and (b) 0.5 M H<sub>2</sub>SO<sub>4</sub> medium at their OCP (Table S1).

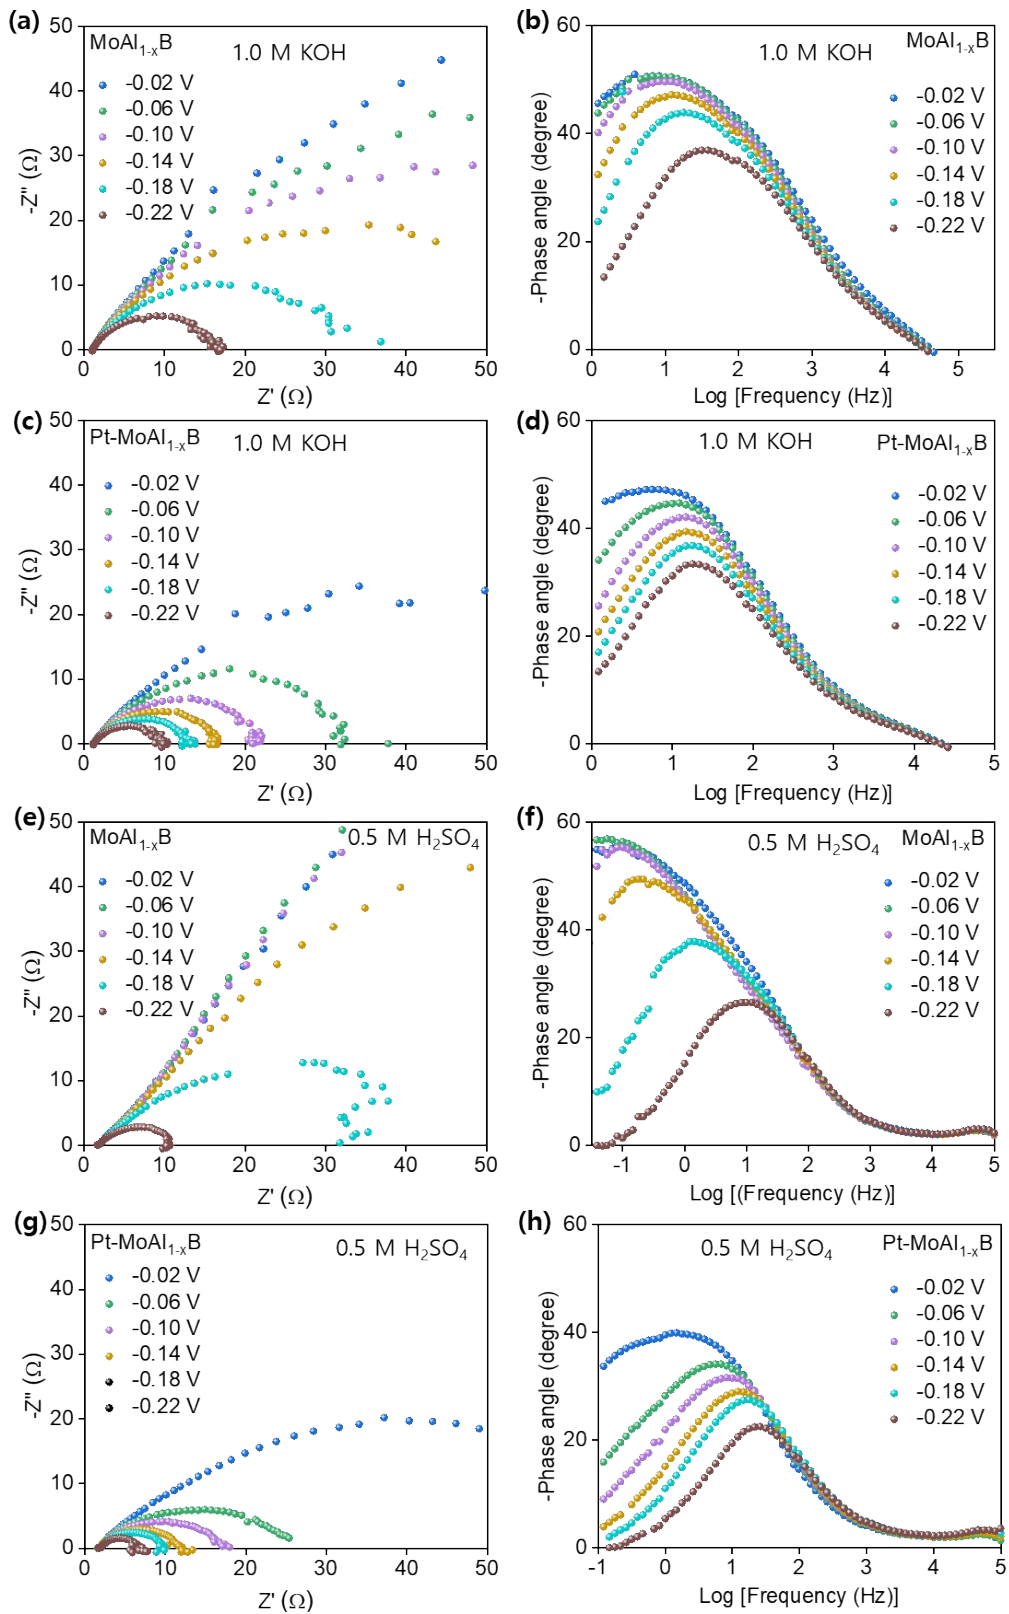

**Figure S21.** (a, c, e, g) Nyquist plots and (b, d, f, h) Bode plots of  $\text{MoAl}_{1-x}\text{B}$  and  $\text{Pt-MoAl}_{1-x}\text{B}$  at different applied potentials in 1.0 M KOH and 0.5 M  $\text{H}_2\text{SO}_4$  medium.

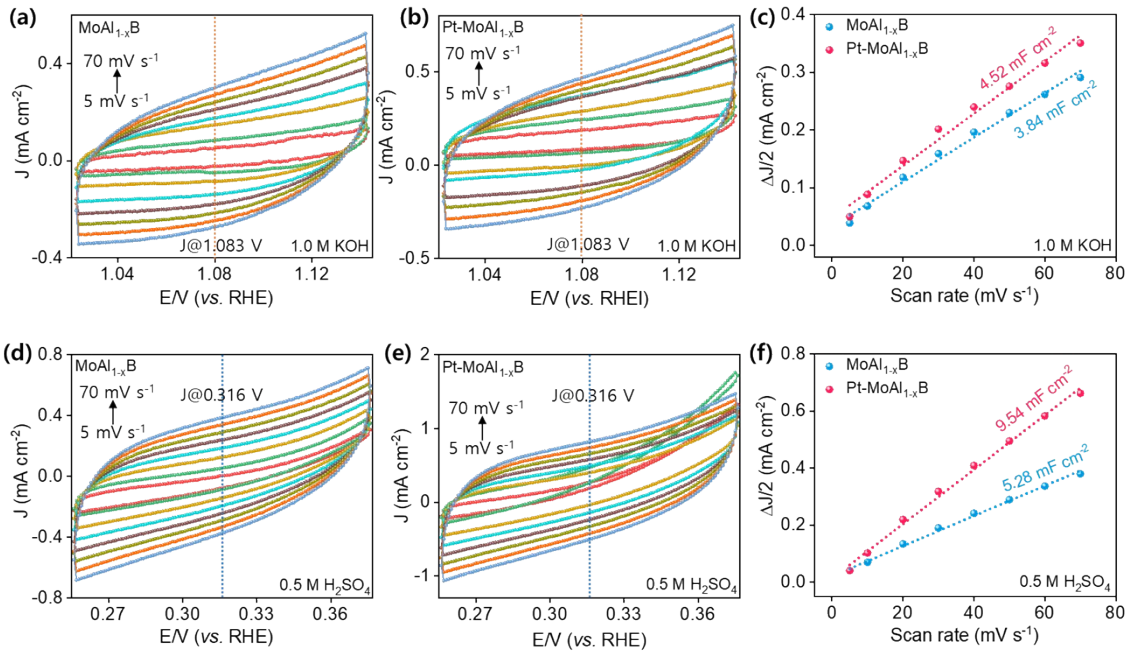

**Figure S22.** CV measurements of (a) MoAl<sub>1-x</sub>B and (b) Pt-MoAl<sub>1-x</sub>B at different scan rates (5, 10, 20, 30, 40, 50, 60, and 70 mV s<sup>-1</sup>) in 1.0 M KOH and (c) their corresponding  $C_{dl}$  values derived from slope of  $(\Delta J/2)$  versus Scan rate ( $J$  value is obtained at  $E = 1.083$  V); CV measurements of (d) MoAl<sub>1-x</sub>B and (e) Pt-MoAl<sub>1-x</sub>B at different scan rates (5, 10, 20, 30, 40, 50, 60, and 70 mV s<sup>-1</sup>) in 0.5 M H<sub>2</sub>SO<sub>4</sub> and (f) their corresponding  $C_{dl}$  values derived from slope of  $(\Delta J/2)$  versus Scan rate ( $J$  value is obtained at  $E = 0.316$  V).

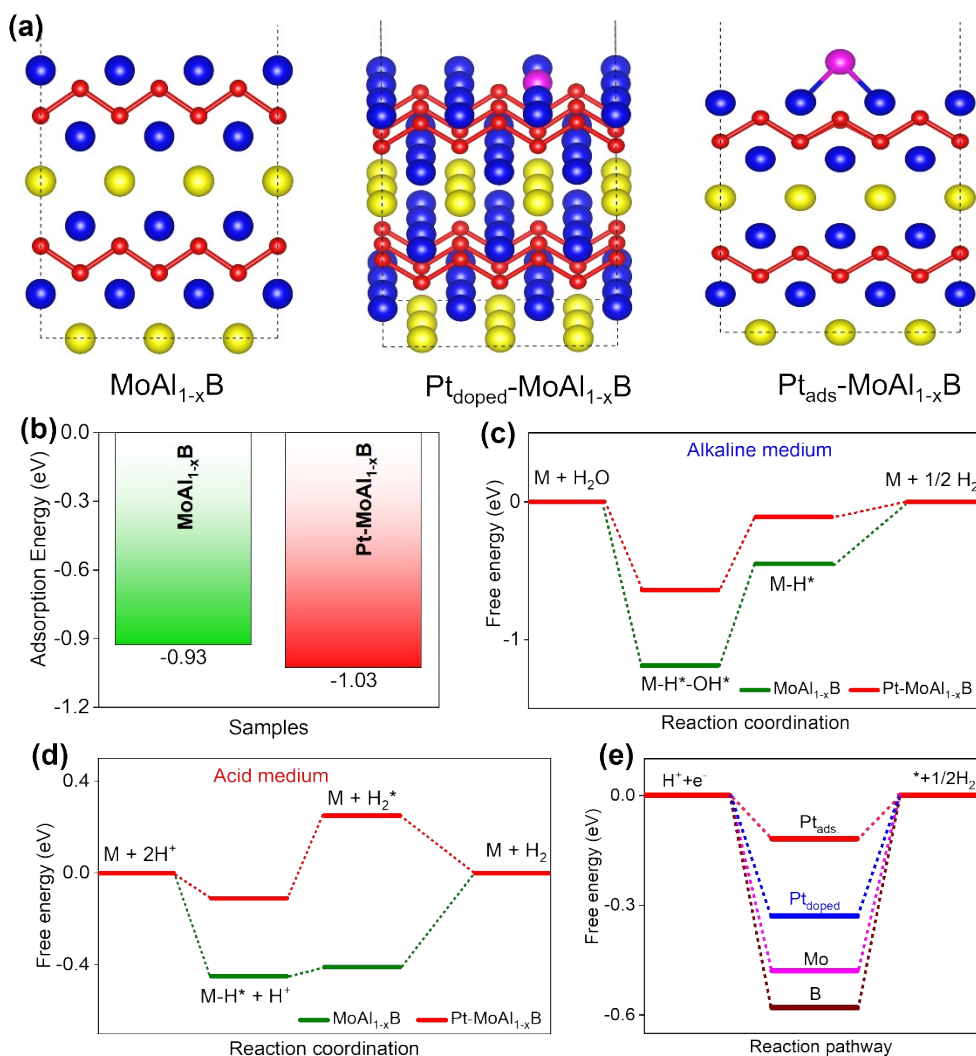

**Figure S23.** (a) Structural models of MoAl<sub>1-x</sub>B and Pt-MoAl<sub>1-x</sub>B materials; (b) Water adsorption energy and (c and d) ΔG diagrams of MoAl<sub>1-x</sub>B and Pt-MoAl<sub>1-x</sub>B materials for HER; (e) The ΔG<sub>H\*</sub> of different active sites in Pt-MoAl<sub>1-x</sub>B structure for HER.



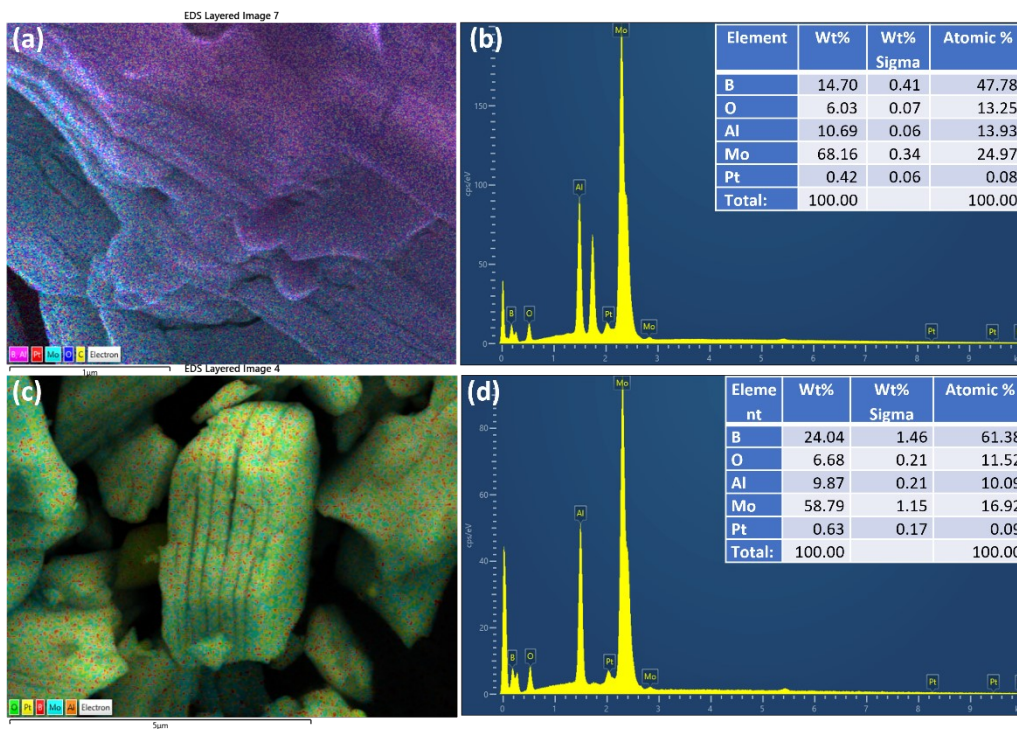

**Figure S24.** SEM-EDS results of Pt–MoAl<sub>1-x</sub>B achieved from (a and b) 200 μL and (c and d) 400 μL of initial [PtCl<sub>6</sub>]<sup>2-</sup> ion precursor (10 mg mL<sup>-1</sup>).

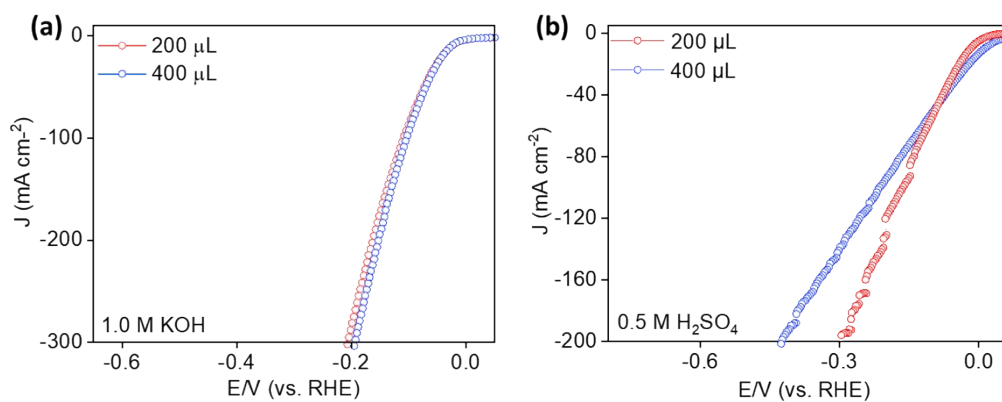

**Figure S25.** HER performance of Pt-MoAl<sub>1-x</sub>B catalyst achieved from 200  $\mu$ L and 400  $\mu$ L of initial [PtCl<sub>6</sub>]<sup>2-</sup> ion precursor (10 mg mL<sup>-1</sup>) in (a) alkaline and (b) acid media.

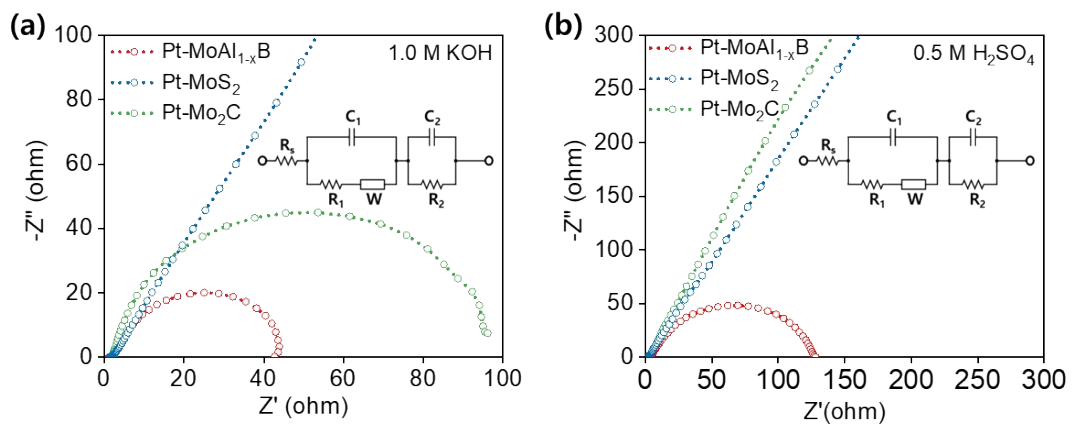

**Figure S26.** EIS measurements of Pt-MoAl<sub>1-x</sub>B, Pt-Mo<sub>2</sub>C, and Pt-MoS<sub>2</sub> in (a) 1.0 M KOH and (b) 0.5 M H<sub>2</sub>SO<sub>4</sub> medium at their OCP (Table S1).

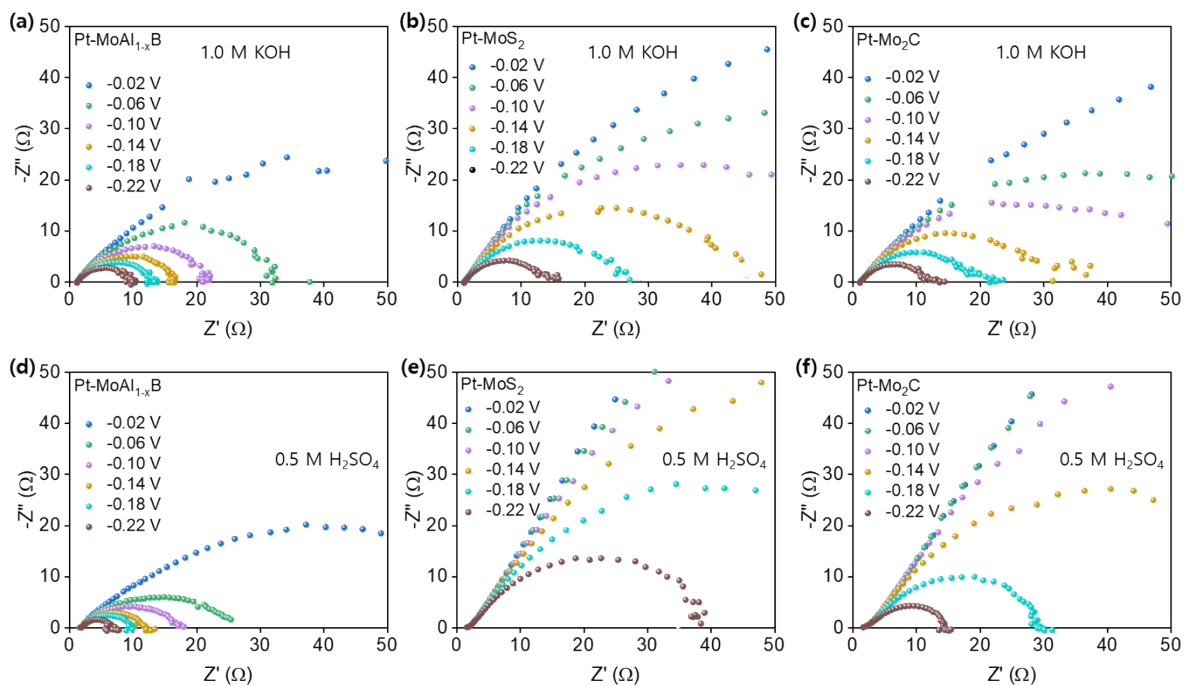

**Figure S27.** Nyquist plots of Pt-MoS<sub>2</sub>, Pt-Mo<sub>2</sub>C, and Pt-MoAl<sub>1-x</sub>B at different applied potential in (a-c) 1.0 M KOH and (d-f) 0.5 M H<sub>2</sub>SO<sub>4</sub> medium.

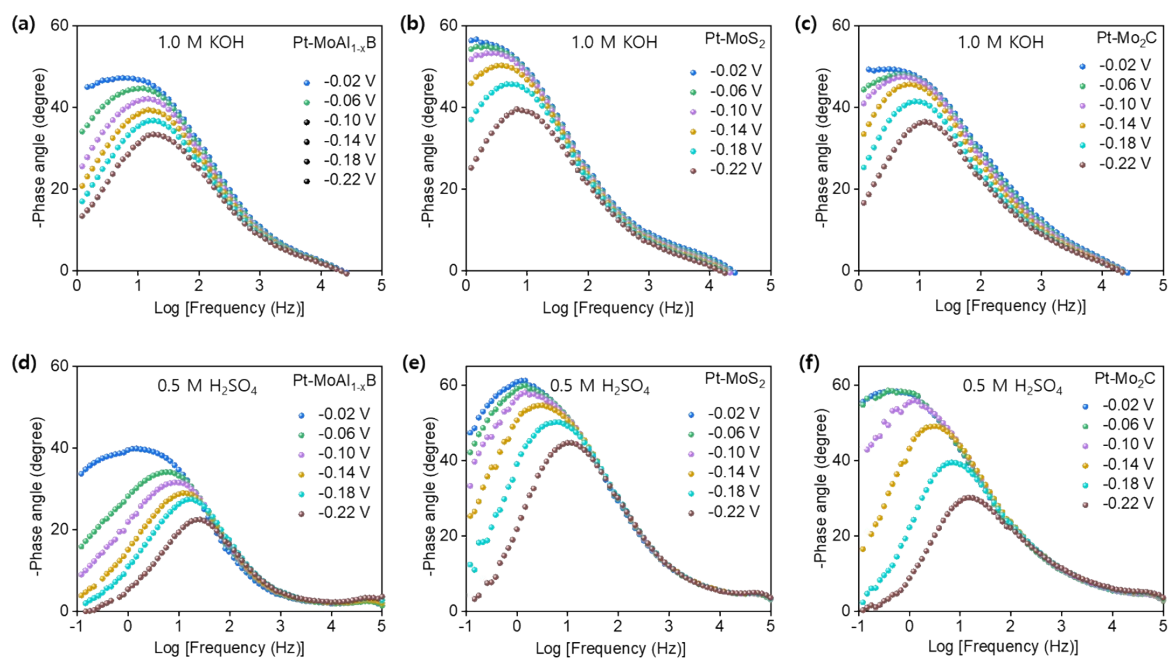

**Figure S28.** Bode plots of Pt-MoS<sub>2</sub>, Pt-Mo<sub>2</sub>C, and Pt-MoAl<sub>1-x</sub>B at different applied potential in (a-c) 1.0 M KOH and (d-f) 0.5 M H<sub>2</sub>SO<sub>4</sub> medium.

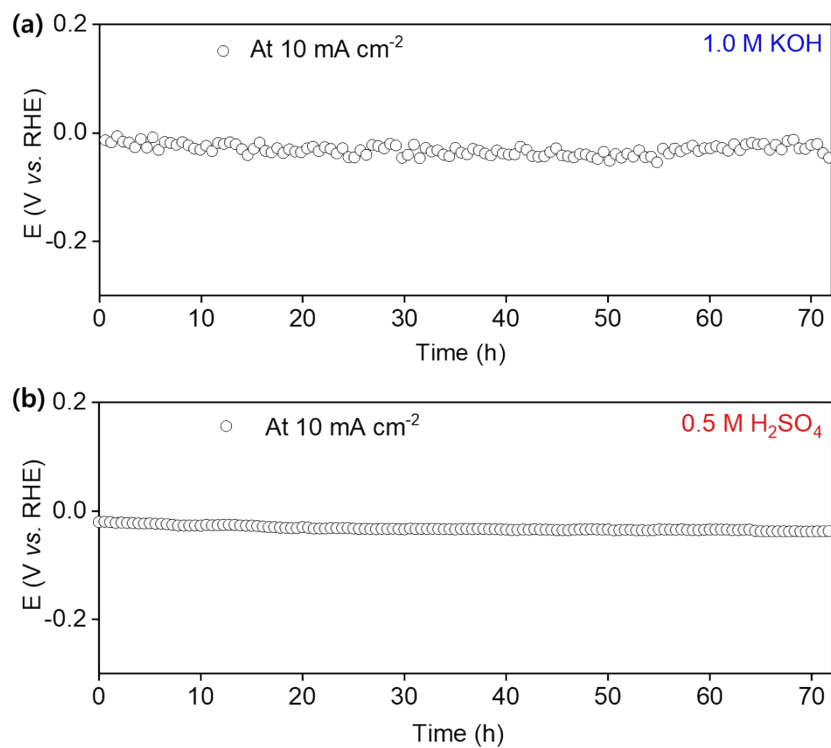

**Figure S29.** HER stability tests of the Pt–MoAl<sub>1-x</sub>B at  $10 \text{ mA cm}^{-2}$  in (a)  $1.0 \text{ M KOH}$  and (b)  $0.5 \text{ M H}_2\text{SO}_4$  medium.

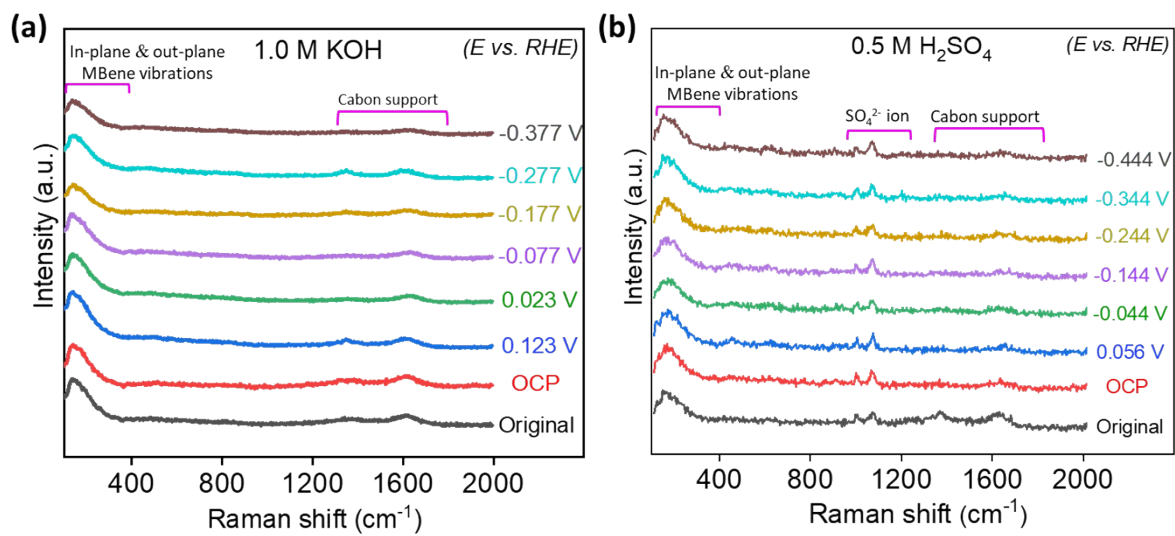

**Figure S30.** In situ Raman analysis of Pt–MoAl<sub>1-x</sub>B catalyst-based electrode during HER at different applied potentials in (a) alkaline and (b) acid media.

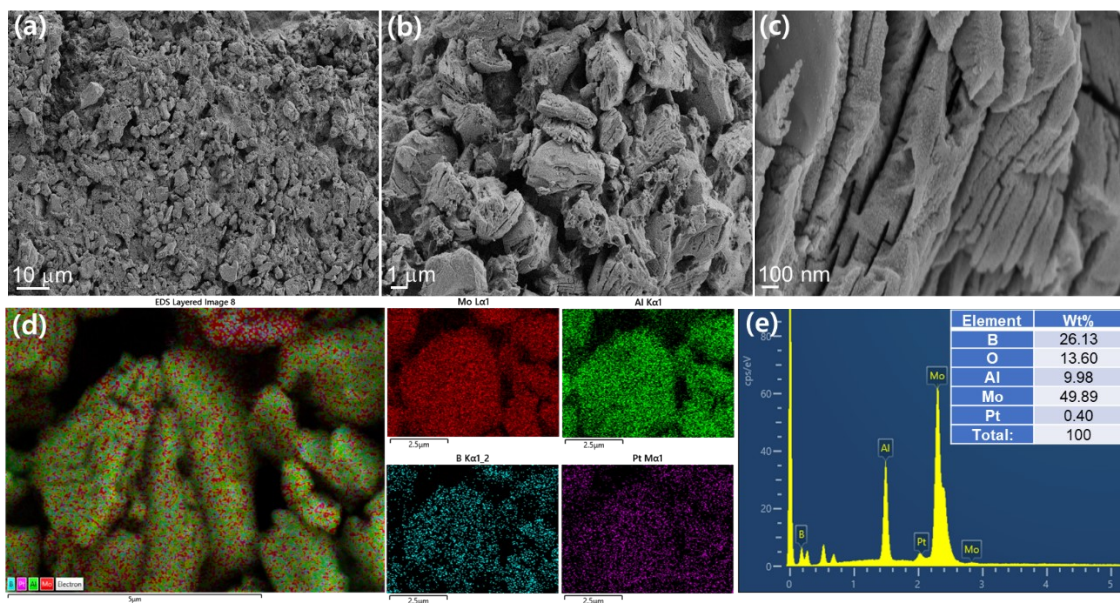

**Figure S31.** The morphology and structure of the post-HER Pt-MoAl<sub>1-x</sub>B catalyst in alkaline medium: (a-c) SEM images at different magnifications; (d) EDS color mapping image; and (e) EDS spectrum.



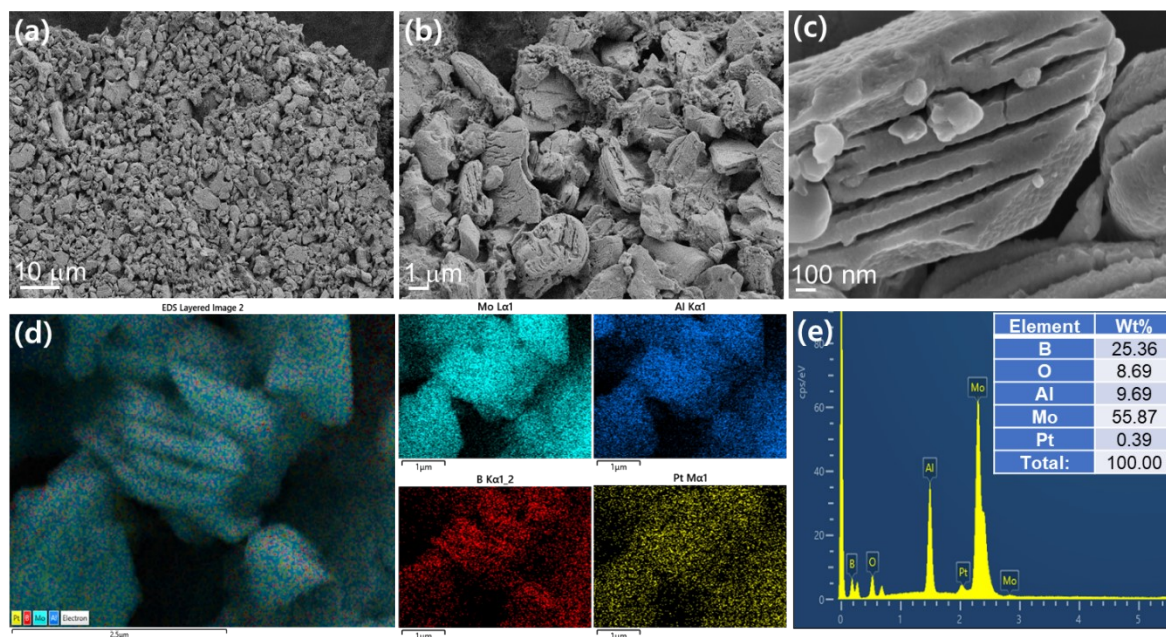

**Figure S32.** The morphology and structure of the post-HER Pt-MoAl<sub>1-x</sub>B catalyst in acid medium: (a-c) SEM images at different magnifications; (d) EDS color mapping image; and (e) EDS spectrum.

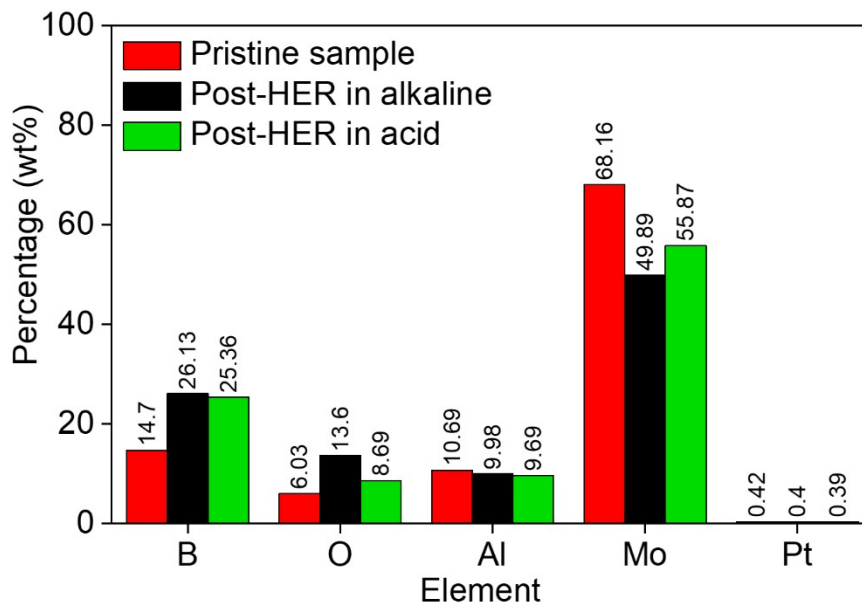

**Figure S33.** Comparison of element composition between pristine Pt–MoAl<sub>1-x</sub>B and the post-HER samples in alkaline and acid media.

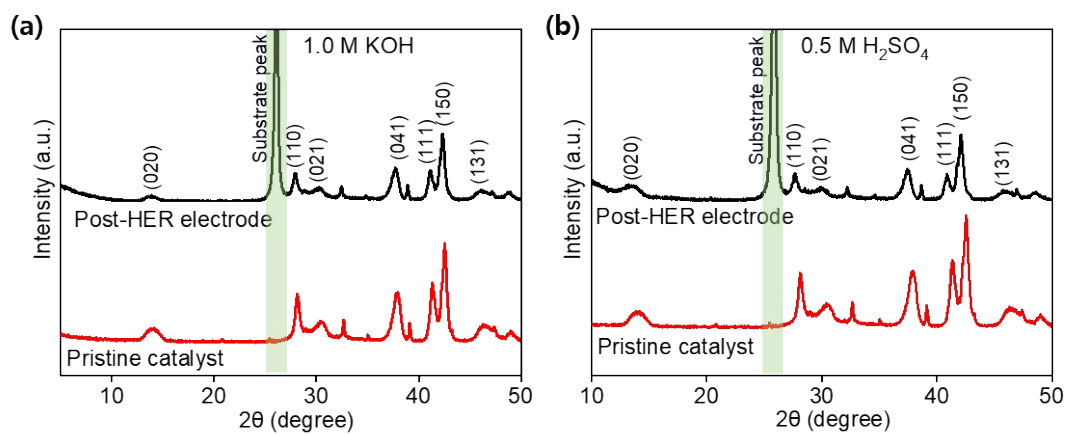

**Figure S34.** XRD analysis for the pristine Pt-MoAl<sub>1-x</sub>B catalyst and the post-HER Pt-MoAl<sub>1-x</sub>B based electrodes working in (a) alkaline and (b) acid medium.

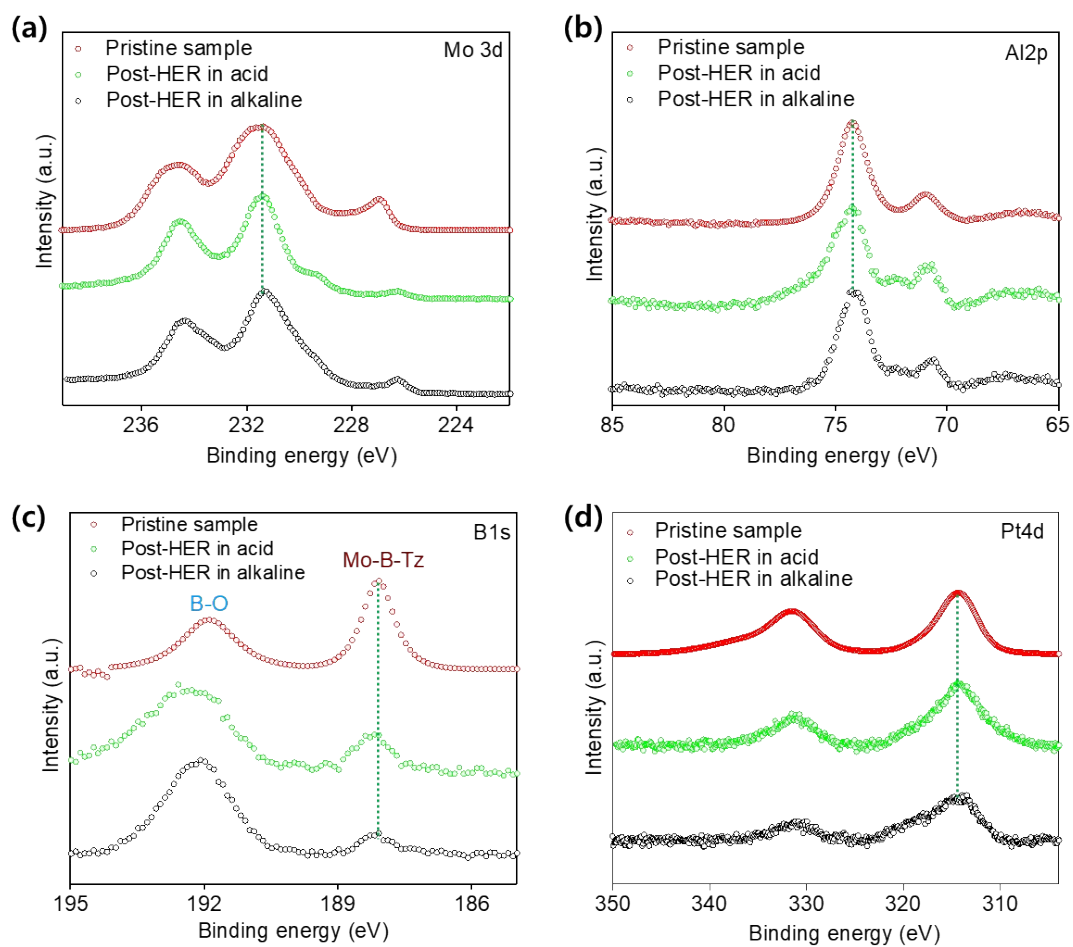

**Figure S35.** Comparison of element composition between pristine Pt-MoAl<sub>1-x</sub>B and the post-HER samples in alkaline and acid media.

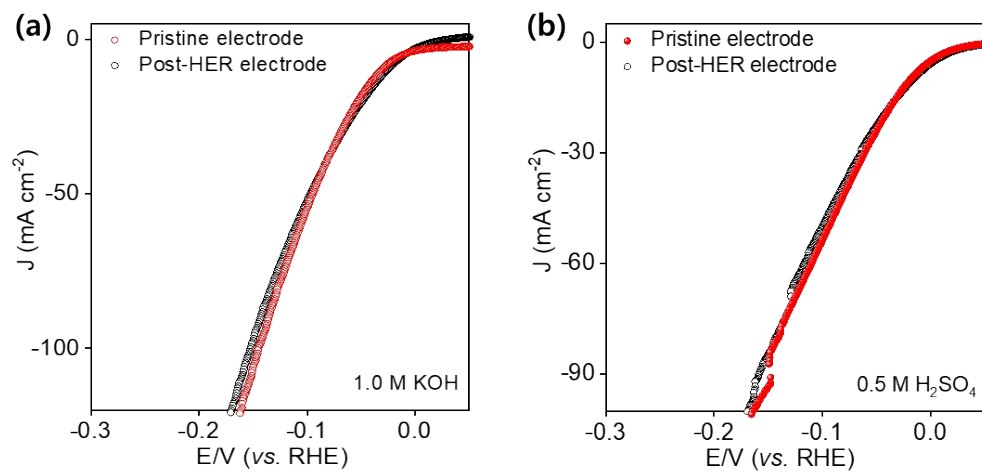

**Figure S36.** The LSV response of the Pt-MoAl<sub>1-x</sub>B based electrode before and after HER stability test in (a) alkaline and (b) acid medium at a scan rate of 5 mV s<sup>-1</sup>.

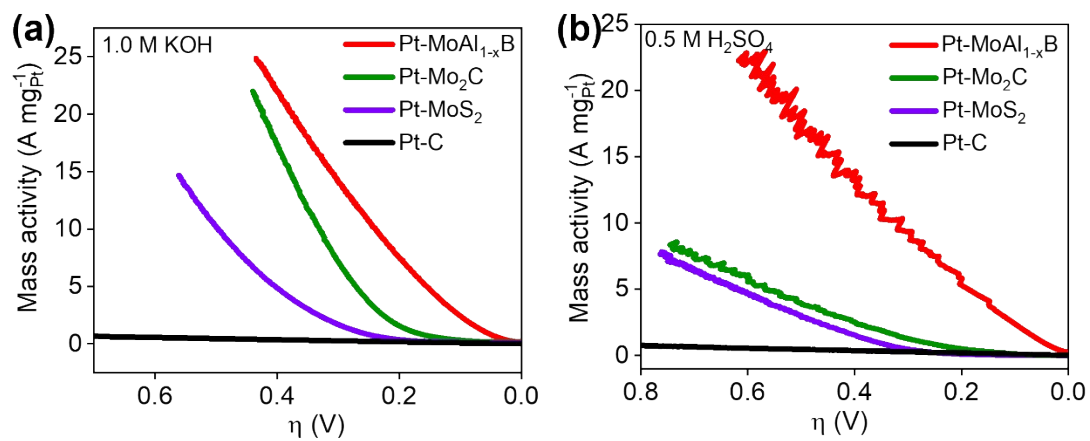

**Figure S37.** Mass activities of the Pt-MoAl<sub>1-x</sub>B, Pt-Mo<sub>2</sub>C, Pt-MoS<sub>2</sub>, and Pt-C in (a) alkaline and (b) acid medium.

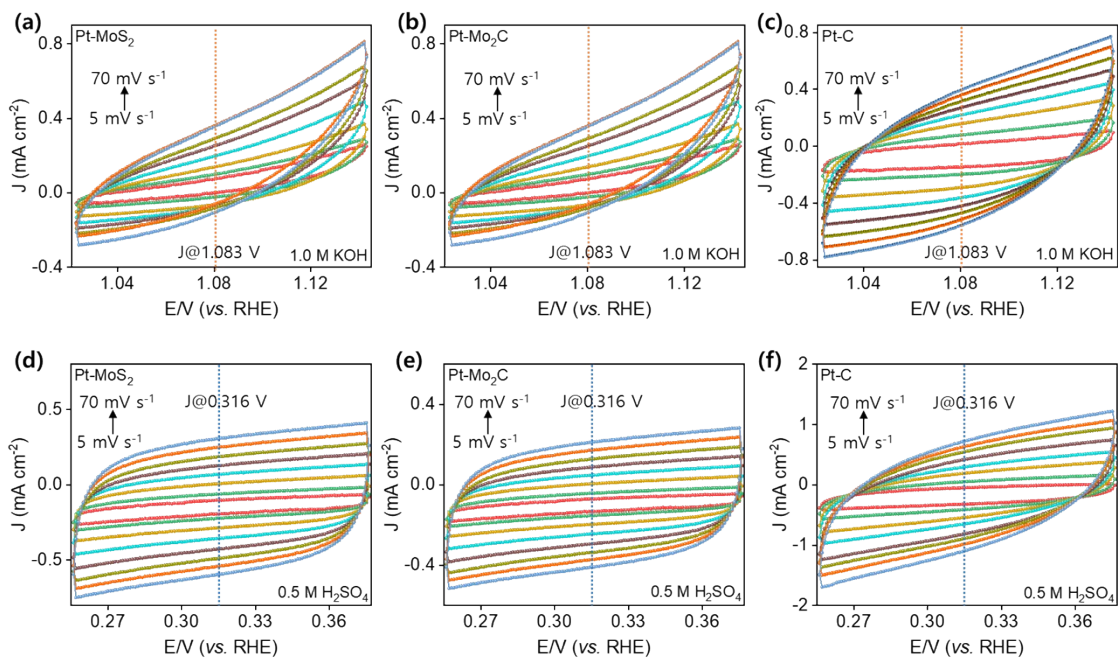

**Figure S38.** CV measurements of the Pt-Mo<sub>2</sub>C, Pt-MoS<sub>2</sub>, and Pt-C at different scan rates (5, 10, 20, 30, 40, 50, 60, and 70 mV s<sup>-1</sup>) in (a-c) alkaline and (d-f) acid medium.

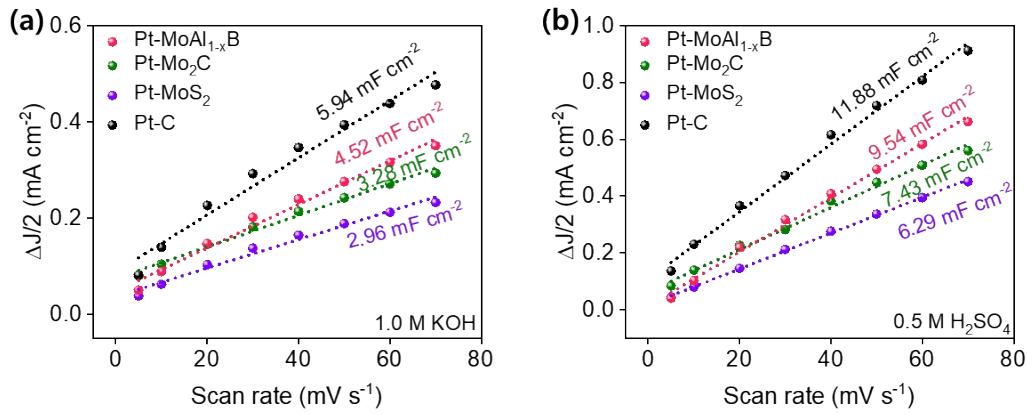

**Figure S39.** (a)  $C_{dl}$  value of Pt–MoAl<sub>1-x</sub>B, Pt–Mo<sub>2</sub>C, Pt–MoS<sub>2</sub>, and Pt–C in alkaline derived from slope of ( $\Delta J/2$ ) versus Scan rate ( $J$  value is obtained at  $E = 1.083$  V); (b)  $C_{dl}$  value of Pt–MoAl<sub>1-x</sub>B, Pt–Mo<sub>2</sub>C, Pt–MoS<sub>2</sub>, and Pt–C in acid medium derived from slope of ( $\Delta J/2$ ) versus Scan rate ( $J$  value is obtained at  $E = 0.316$  V).

The ECSA is examined by CV at various scan rates in non-faradic regions for the electrodes of catalyst-deposited NF (or CC) and bare NF (or CC) to achieve their  $C_{dl}$  values. The ECSA value are calculated by using the following equation:

$$ECSA = \frac{C_{dl}}{C_{dl(substrate)}} \quad (4)$$

While the  $C_{dl}$  of bare NF in 1.0 M KOH is chosen as  $1.56 \text{ mF cm}^{-2}$ , which is measured by our previous research for the same type of NF substrate,<sup>9</sup> the  $C_{dl}$  of bare CC in 0.5 M H<sub>2</sub>SO<sub>4</sub> is found to be  $0.2 \text{ mF cm}^{-2}$  by CV measurement in Fig. S30.



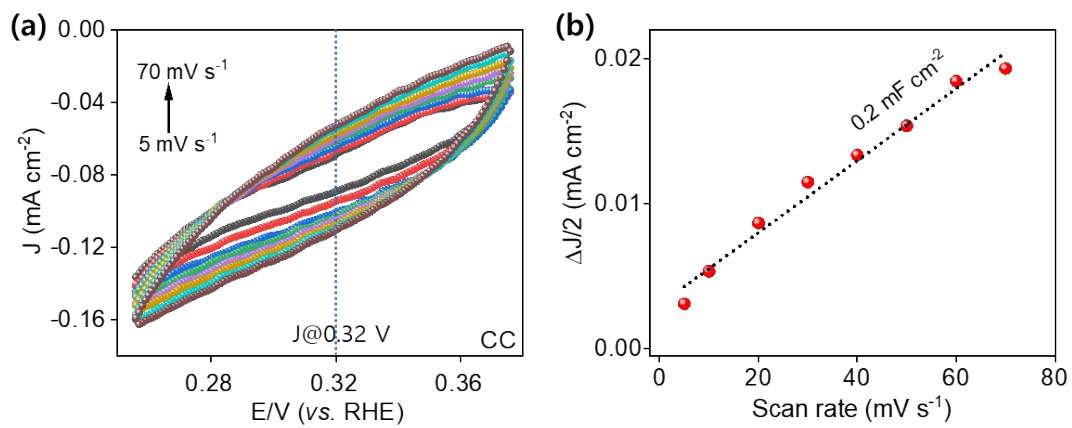

**Figure S40.** (a) CV measurement and (b)  $C_{dl}$  value of bare CC substrate in acid medium derived from slope of  $(\Delta J/2)$  versus Scan rate ( $J$  value is obtained at  $E = 0.32 \text{ V}$ ).

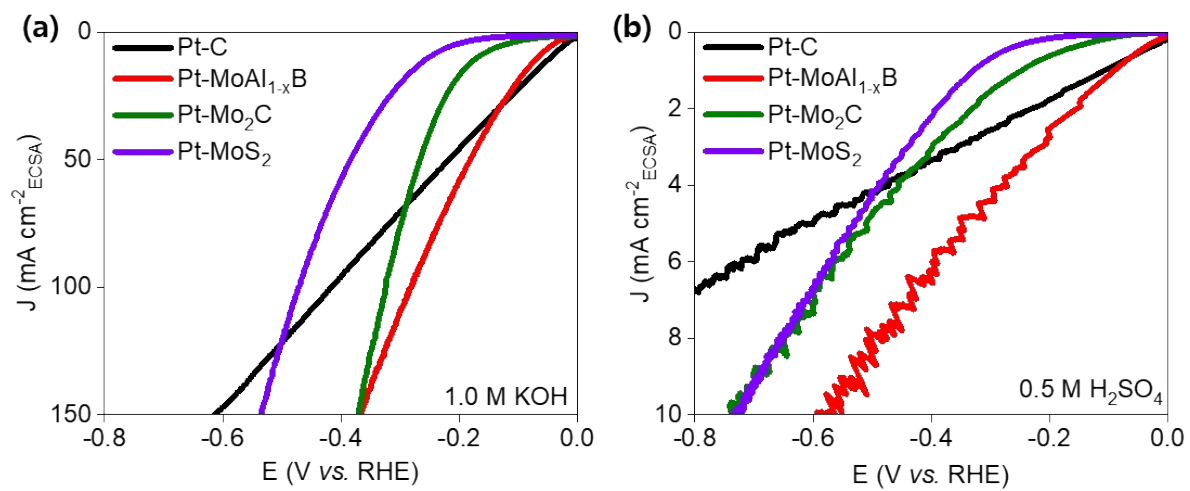

**Figure S41.** Specific activities of the Pt-MoAl<sub>1-x</sub>B, Pt-Mo<sub>2</sub>C, Pt-MoS<sub>2</sub>, and Pt-C in (a) alkaline and (b) acid media.

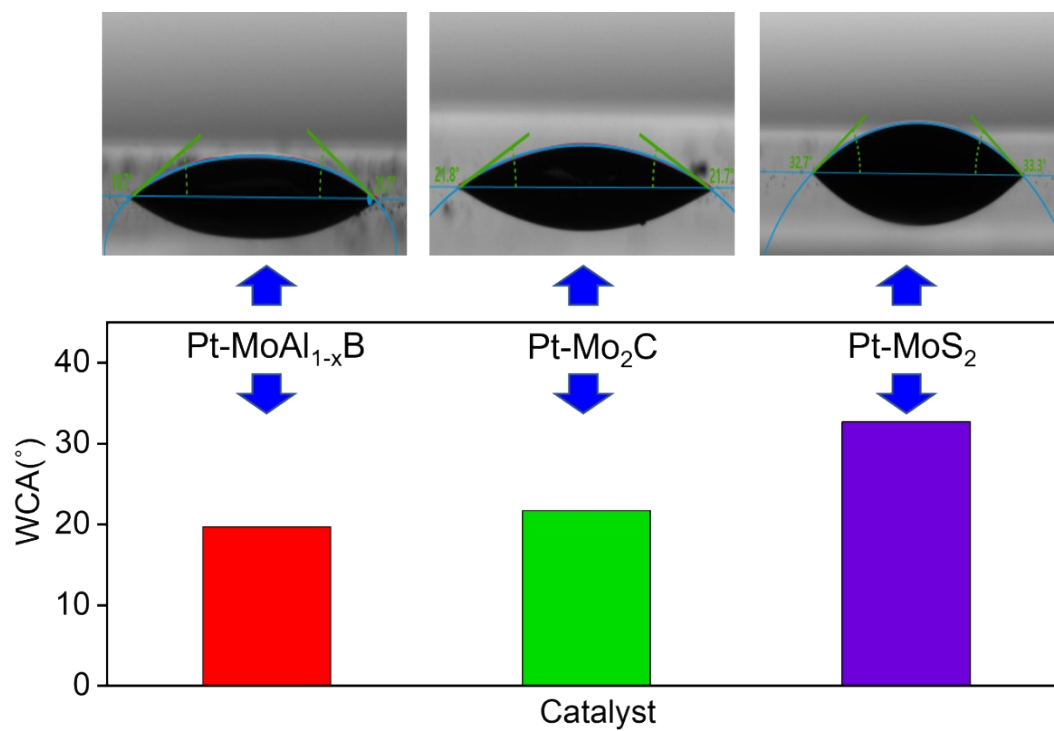

**Figure S42.** Water contact angle (WCA) measurement of the Pt-MoAl<sub>1-x</sub>B, Pt-Mo<sub>2</sub>C, and Pt-MoS<sub>2</sub> catalysts.

The turnover frequency (TOF) was calculated by the following equation:

$$TOF = \frac{J}{n \times m \times F} \quad (5)$$

where  $J$  is the measured geometric current density from LSV curve,  $n$  is number of active sites (mol),  $m$  is the factor ( $1/m$  implies that  $m$  electrodes are required to form one  $H_2$  molecule from water, in other words,  $m$  value for HER is 2) and  $F$  is the Faraday constant. Note that the number of active sites ( $n$ ) was assessed by cyclic voltammetry tests (Figure S33) in phosphate-buffered saline solution (1.0 M PBS, pH  $\sim 7$ ), as indicated in previous reports.<sup>9,10</sup>

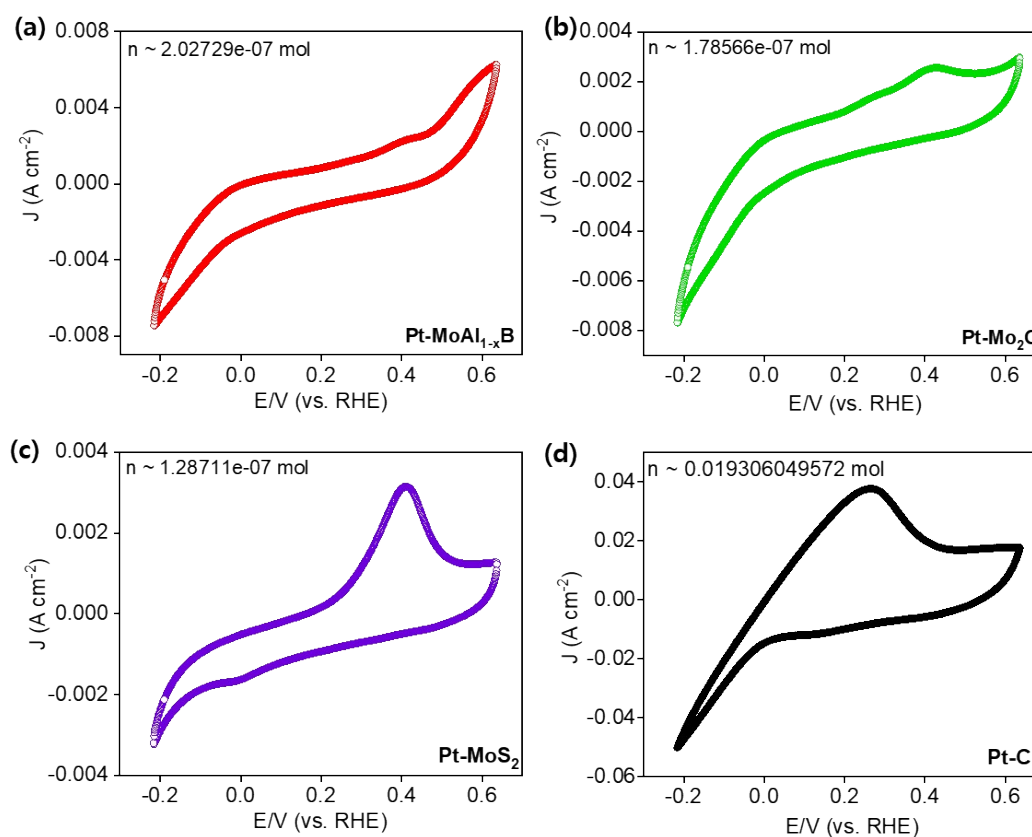

**Figure S43.** CV measurements of (a) Pt–MoAl<sub>1-x</sub>B, (b) Pt–Mo<sub>2</sub>C, (c) Pt–MoS<sub>2</sub>, and (d) Pt–C catalysts at a scan rate of 50 mV s<sup>-1</sup> in 1.0 M PBS electrolyte.

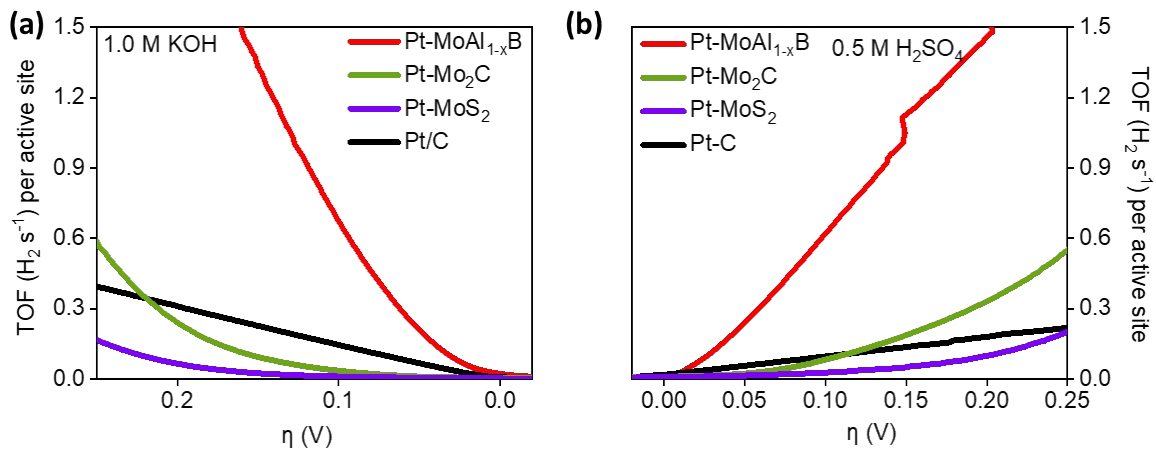

**Figure 44.** TOF performance of different catalysts towards HER in (a) alkaline and (b) acid media (The TOF calculation is based on the capacitance of the bulk catalysts).

We try to quantify the active Pt sites to get a better understanding of the activity via estimation of the number of active Pt sites in Pt-MoAl<sub>1-x</sub>B, Pt-MoS<sub>2</sub>, and Pt-Mo<sub>2</sub>C from Pt content and Pt atomic weight (determined by ICP-OES) on the working electrode with the hypothesis that all content of Pt is single atoms and each Pt single atom accounts for one active site exposed to electrolyte. Then the TOF can be calculated as follows:

$$TOF = \frac{\text{Total hydrogen turnovers per geometric area}}{\text{The number of active Pt centers per geometric area}} \quad (6)$$

In which, the Total hydrogen turnovers were calculated as the following equations:

$$\begin{aligned} & \text{Total hydrogen turnovers} \\ &= (|j| \text{ mA cm}^{-2}) \left( \frac{1 \text{ C s}^{-1}}{1000 \text{ mA}} \right) \left( \frac{1 \text{ mol e}^{-}}{96485 \text{ C}} \right) \left( \frac{1 \text{ mol}}{2 \text{ mol e}^{-}} \right) \left( \frac{6.022 \times 10^{23} \text{ molecules H}_2}{1 \text{ mol H}_2} \right) \\ &= 3.12 \times 10^{15} |j| \frac{\text{H}_2 \text{ s}^{-1}}{\text{cm}^2} \text{ per mA cm}^{-2} \end{aligned} \quad (7)$$

The number of active Pt centers were estimated from the total catalyst loading per geometric area:

$$\begin{aligned} & \text{Number of active Pt centers} \\ &= \left( \frac{\text{Catalyst loading per geometric area (g cm}^{-2}) \times \text{Pt content (wt.\%)}}{\text{Pt atomic weight (g mol}^{-1})} \right) \\ & \times \left( \frac{6.022 \times 10^{23} \text{ atom Pt}}{1 \text{ mol Pt}} \right) \end{aligned} \quad (8)$$

Finally, the current density obtained from LSV curves can be convert into TOF value according to:

$$TOF_{Pt-MoAl_{1-x}B} = 0.044 \times |j| \quad (9)$$

$$TOF_{Pt-Mo_2C} = 0.028 \times |j| \quad (10)$$

$$TOF_{Pt-MoS_2} = 0.002 \times |j| \quad (11)$$

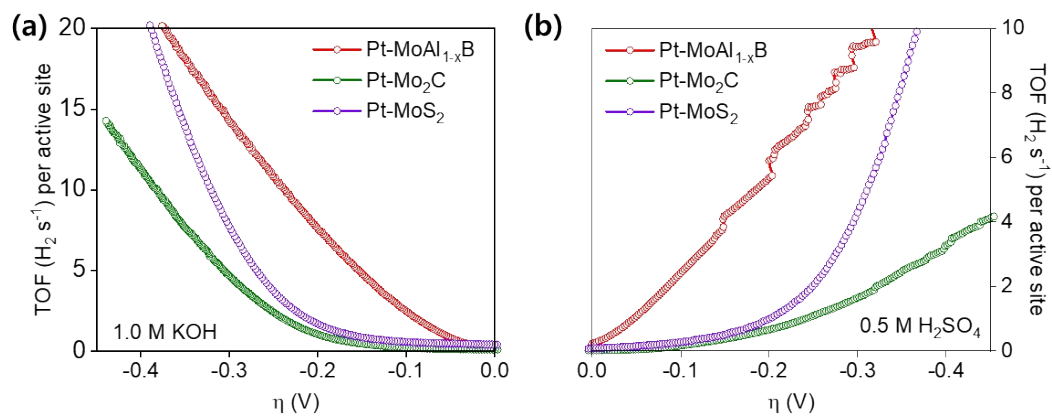

**Figure S45.** TOF values of Pt-MoAl<sub>1-x</sub>B, Pt-MoS<sub>2</sub>, and Pt-Mo<sub>2</sub>C towards HER in (a) alkaline and (b) acid medium (The TOF calculation is based on the hypothesis that all content of Pt is single atoms and each Pt single atom accounts for one active site exposed to electrolyte).

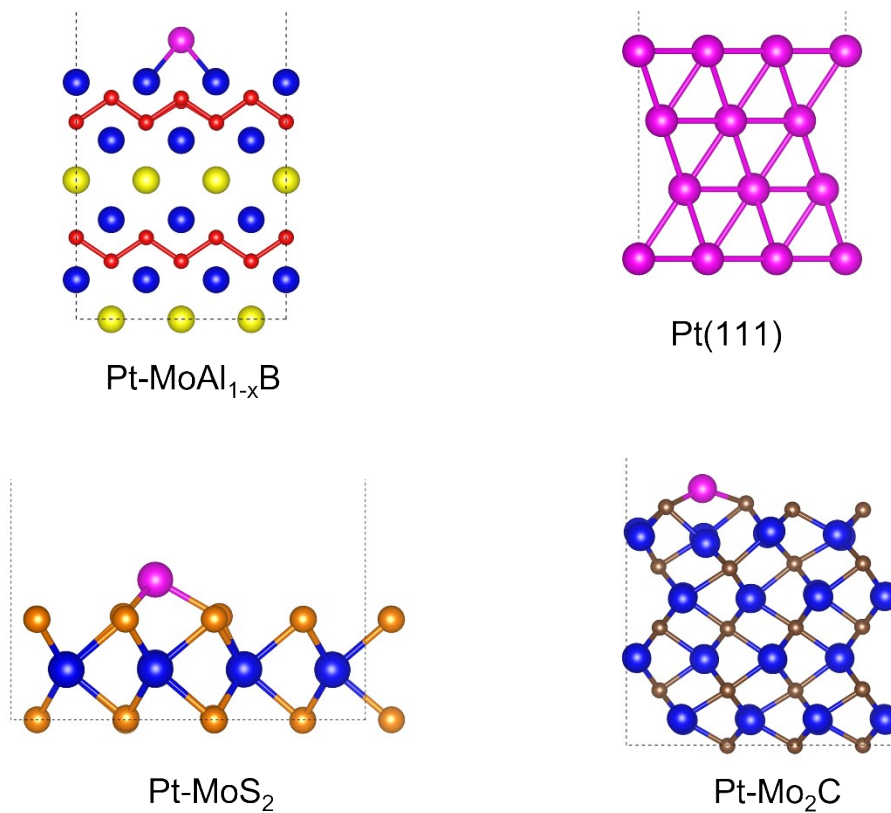

**Figure S46.** Theoretical material models of Pt-MoAl<sub>1-x</sub>B, Pt-Mo<sub>2</sub>C, Pt-MoS<sub>2</sub>, and Pt-C for DFT calculation.



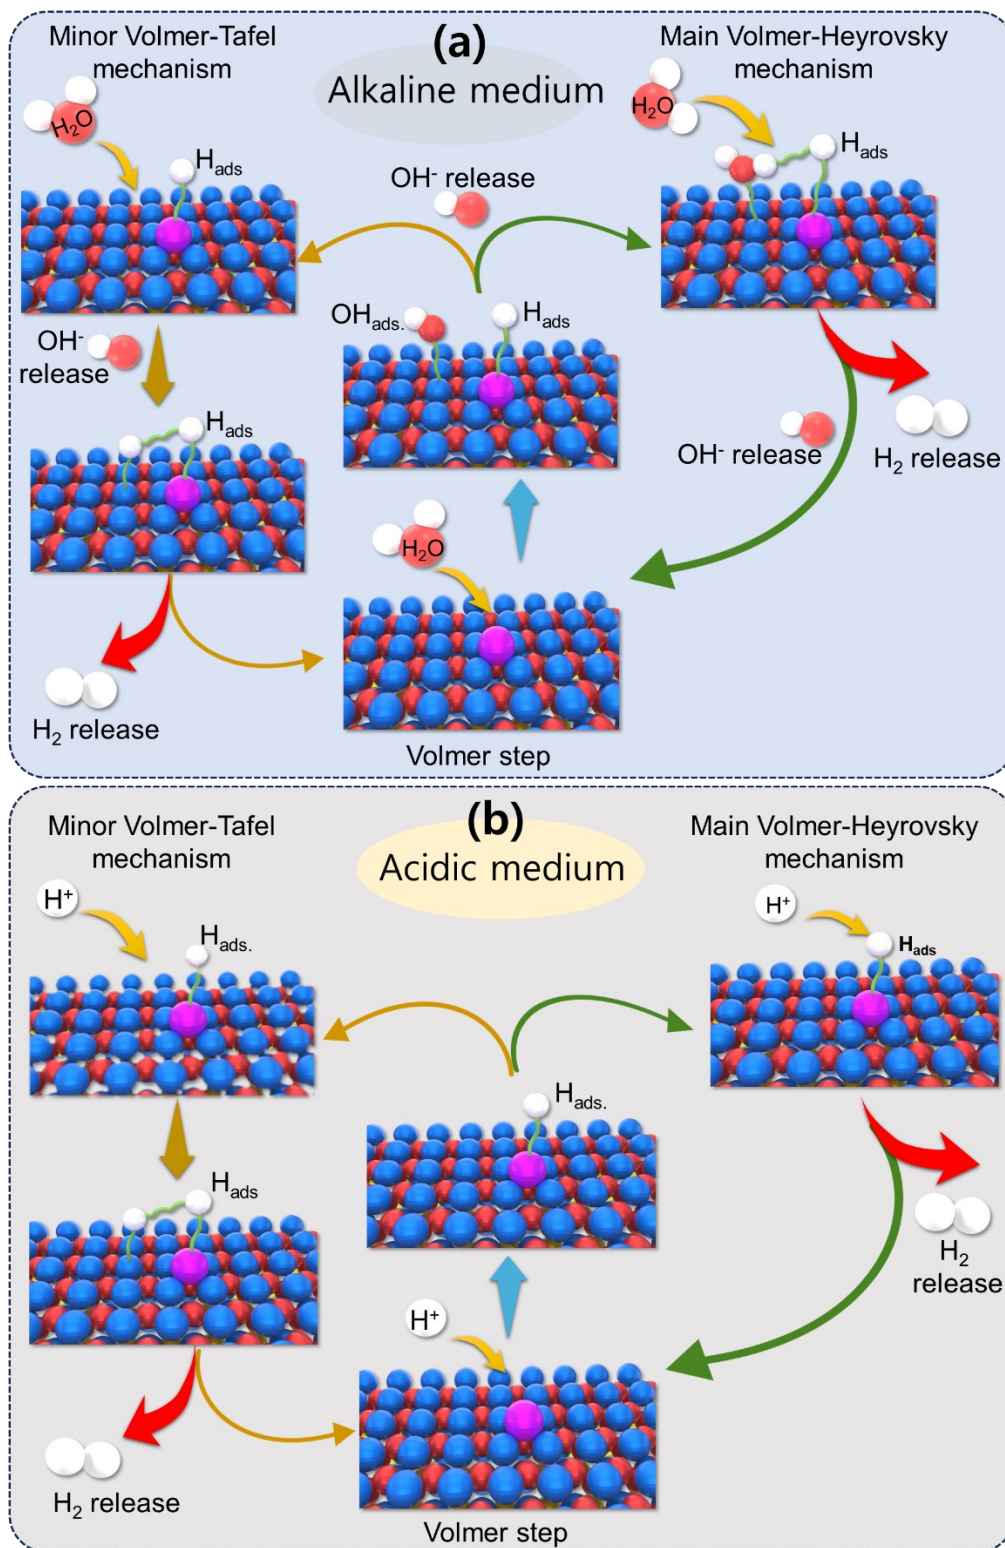

**Figure S47.** Schematic illustration for the main Volmer-Heyrovsky HER mechanism and minor Volmer-Heyrovsky HER mechanism occurring on Pt–MoAl<sub>1-x</sub>B surface in (a) alkaline and (b) acid medium.

**Table S1.** Open circuit potential (OCP) values of MoAl<sub>1-x</sub>B, Pt-MoAl<sub>1-x</sub>B, Pt-MoS<sub>2</sub>, and Pt-Mo<sub>2</sub>C in alkaline and acid media.

| <b>Catalysts</b>         | <b>OCP in 1.0 M KOH<br/>(V)</b> | <b>OCP in 0.5 M H<sub>2</sub>SO<sub>4</sub><br/>(V)</b> |
|--------------------------|---------------------------------|---------------------------------------------------------|
| MoAl <sub>1-x</sub> B    | -0.807                          | 0.07                                                    |
| Pt-MoAl <sub>1-x</sub> B | -0.805                          | 0.055                                                   |
| Pt-Mo <sub>2</sub> C     | -0.468                          | 0.192                                                   |
| Pt-MoS <sub>2</sub>      | -0.078                          | 0.229                                                   |

**Table S2.** Exchange current density ( $j_0$ ) of MoAl<sub>1-x</sub>B, Pt-MoAl<sub>1-x</sub>B, Pt-MoS<sub>2</sub>, Pt-Mo<sub>2</sub>C, and Pt-C towards HER in alkaline and acid media.

| <b>Catalysts</b>         | <b><math>j_0</math> in 1.0 M KOH<br/>(mA cm<sup>-2</sup>)</b> | <b><math>j_0</math> in 0.5 M H<sub>2</sub>SO<sub>4</sub><br/>(mA cm<sup>-2</sup>)</b> |
|--------------------------|---------------------------------------------------------------|---------------------------------------------------------------------------------------|
| MoAl <sub>1-x</sub> B    | 0.02                                                          | 0.05                                                                                  |
| Pt-MoAl <sub>1-x</sub> B | 38.0                                                          | 25.11                                                                                 |
| Pt-Mo <sub>2</sub> C     | 1.69                                                          | 2.81                                                                                  |
| Pt-MoS <sub>2</sub>      | 0.69                                                          | 0.38                                                                                  |
| Pt-C                     | 44.6                                                          | 34.67                                                                                 |

**Table S3.** The ICP-OES analysis for the electrolyte after long-term stability test of Pt–MoAl<sub>1-x</sub>B in 1.0 M KOH medium.

| <b>Elements</b> | <b>Content in post-HER electrolyte<br/>(<math>\mu\text{g/mL}</math>)</b> | <b>Leaching<br/>content (%)</b> |
|-----------------|--------------------------------------------------------------------------|---------------------------------|
| Mo              | 1.17                                                                     | 5.3                             |
| Al              | 0.1                                                                      | 2.5                             |
| B               | 0.04                                                                     | 1.6                             |
| Pt              | 0.0                                                                      | 0.0                             |

\

**Table S4.** The ICP-OES analysis for the electrolyte after long-term stability test of Pt–MoAl<sub>1-x</sub>B in in 0.5 M H<sub>2</sub>SO<sub>4</sub> medium.

| <b>Elements</b> | <b>Content in post-HER electrolyte<br/>(<math>\mu\text{g/mL}</math>)</b> | <b>Leaching<br/>content (%)</b> |
|-----------------|--------------------------------------------------------------------------|---------------------------------|
| Mo              | 0.58                                                                     | 2.7                             |
| Al              | 0.08                                                                     | 2.0                             |
| B               | 0.03                                                                     | 1.2                             |
| Pt              | 0.0                                                                      | 0.0                             |

**Table S5.** Comparison of  $\eta@10 \text{ mA cm}^{-2}$  between our catalyst and recently reported representative HER catalysts in alkaline electrolyte.

| Catalyst                                                           | $\eta@10 \text{ mA cm}^{-2}$ (mV) | References                                 |
|--------------------------------------------------------------------|-----------------------------------|--------------------------------------------|
| Pt–MoAl <sub>1-x</sub> B                                           | 32                                | This work                                  |
| Ru/Ni-MoS <sub>2</sub>                                             | 32                                | Appl. Catal. B: Environ. 298 (2021) 120557 |
| CC@WO <sub>3</sub> /Ru SAs                                         | 34                                | Chem. Eng. J. 430 (2022) 132953            |
| Pt SA-PNPM                                                         | 36                                | ACS Nano 16 (2022) 4116                    |
| Pt/NiRu-OH                                                         | 38                                | Appl. Catal. B: Environ. 269 (2020) 118824 |
| Ru-MoS <sub>2</sub> /CC                                            | 41                                | Appl. Catal. B: Environ. 249 (2019) 91     |
| IrNi-N-C                                                           | 45                                | Nano Energy 98 (2022) 107296               |
| PtSA-C <sub>1</sub> N <sub>1</sub>                                 | 46                                | Nat. Commun. 11 (2020) 1029                |
| Pt <sub>1</sub> /N-C                                               | 46                                | Nat. Commun. 11 (2020) 1029                |
| Ru <sub>1</sub> CoP/CDs                                            | 51                                | Angew. Chem. Int. Ed. 60 (2021) 7234       |
| Ru@2H-MoS <sub>2</sub>                                             | 51                                | Appl. Catal. B: Environ. 298 (2021) 120490 |
| Ni <sub>5</sub> P <sub>4</sub> -Ru                                 | 54                                | Adv. Mater. 32 (2020) 1906972              |
| Ru SAs–Ni <sub>2</sub> P                                           | 57                                | Nano Energy 80 (2021) 105467               |
| Ir <sub>SA</sub> -NS-Ti <sub>3</sub> C <sub>2</sub> T <sub>x</sub> | 57.7                              | J. Mater. Chem. A 10 (2022) 9878           |
| E-Co SAs                                                           | 59                                | Adv. Funct. Mater. 31 (2021) 2100547       |
| W <sub>1</sub> Mo <sub>1</sub> -NG                                 | 67                                | Sci. Adv. 6 (2020) eaba6586                |
| Co-MoS <sub>2</sub> /V <sub>2</sub> C@CC                           | 70.1                              | Chem. Eng. J. 450 (2022) 138157            |
| SA-Ru-MoS <sub>2</sub>                                             | 76                                | Small methods. 3 (2019) 1900653            |
| Ni-1T MoS <sub>2</sub>                                             | 91                                | Small 18 (2022) 2107238                    |
| Ni-SA/NC                                                           | 102                               | Adv. Mater. 33 (2021) 2003846              |
| Ni <sub>1</sub> /g-CN                                              | 120                               | Appl. Catal. B: Environ. 264 (2020) 118521 |
| SA-Pt/MoS <sub>2</sub>                                             | 123                               | Small 18 (2022) 2104824                    |
| Cu@MoS <sub>2</sub>                                                | 131                               | Appl. Catal. B: Environ. 251 (2019) 87     |
| Co doped $\beta$ -Mo <sub>2</sub> C                                | 141                               | Adv. Funct. Mater. 30 (2020) 2000561       |
| SACo-N/C                                                           | 178                               | Sci. Bulletin 64 (2019) 1095               |

**Table S6.** Comparison of  $\eta@10 \text{ mA cm}^{-2}$  between our catalyst and recently reported representative HER catalysts in acidic electrolyte.

| Catalyst                                               | $\eta@10 \text{ mA cm}^{-2}$ (mV) | References                             |
|--------------------------------------------------------|-----------------------------------|----------------------------------------|
| Pt-MoAl <sub>1-x</sub> B                               | 18                                | This work                              |
| Pt-SA/ $\alpha$ -MoO <sub>x</sub>                      | 19                                | Nano Energy 70 (2020) 104529           |
| Pt <sub>1</sub> /N-C                                   | 19                                | Nat. Commun. 11 (2020) 1029            |
| Pt-PVP/TNR@GC                                          | 21                                | Angew. Chem. Int. Ed. 132 (2020) 16036 |
| Pt-SAs/WS <sub>2</sub>                                 | 32                                | Nat. Commun. 12 (2021) 3021            |
| Pt/MXene                                               | 34                                | Adv. Funct. Mater. 32 (2022) 2110910   |
| Pt SA-PNPM                                             | 35                                | ACS Nano 16 (2022) 4116                |
| PtSA/OLC                                               | 38                                | Nat. Energy 4 (2019) 512               |
| Ti <sub>3</sub> C <sub>2</sub> T <sub>x</sub> -PtSA    | 38                                | Nano Lett. 22 (2022) 1398              |
| Pt1/NMHCS                                              | 40                                | Adv. Mater. 33 (2021) 2008599          |
| er-WS <sub>2</sub> -Pt                                 | 40                                | Adv. Mater. 30 (2017) 1704779          |
| Pt-MWCNTs                                              | 44                                | Nano Energy 63 (2019) 1038.            |
| Ru-CoP/CDs                                             | 51                                | Angew. Chem. Int. Ed. 60 (2021) 7234   |
| PtSA/S-C                                               | 53                                | Nat. Commun. 10 (2019) 4977.           |
| Pt-MoS <sub>2</sub>                                    | 60                                | Energy Environ. Sci. 8 (2015) 1594     |
| MXene@Pt/SWCNTs                                        | 62                                | Adv. Funct. Mater. 30 (2020) 2000693   |
| CM@Ru                                                  | 63                                | Adv. Energy. Mater. 10 (2020) 2000882  |
| CNT-V-Fe-Ru                                            | 64                                | ACS Catal. 13 (2023) 49                |
| PtN <sub>x</sub> /TiO <sub>2</sub>                     | 67                                | Nano Energy 73 (2020) 104739           |
| RuSA-N-S-Ti <sub>3</sub> C <sub>2</sub> T <sub>x</sub> | 76                                | Adv. Mater. 31 (2019) 1903841          |
| Pt-decorated VS <sub>2</sub>                           | 77                                | ACS Nano 14 (2020) 5600                |
| Rh/SiNW                                                | 85                                | Nat. Commun. 7 (2016) 12272            |
| Pt@PCM                                                 | 105                               | Sci. Adv. 4 (2018) 6657                |
| Pt@PM                                                  | 106                               | Sci. Adv. 4 (2018) eaao6657            |
| Co-MoS <sub>2</sub>                                    | 137                               | Angew. Chem. Int. Ed. 133 (2021) 7327  |

**Table S7.** Comparison of TOF@ $\eta = 100$  mV between our catalyst and recently reported representative HER catalysts in alkaline electrolyte.

| <b>Catalyst</b>                                        | <b>TOF@<math>\eta = 100</math> mV (s<sup>-1</sup>)</b> | <b>References</b>                           |
|--------------------------------------------------------|--------------------------------------------------------|---------------------------------------------|
| Pt–MoAl <sub>1-x</sub> B                               | 0.68                                                   | This work                                   |
| NiP <sub>2</sub> -CeO <sub>2</sub>                     | 0.593                                                  | Inorg. Chem. 57 (2018) 548                  |
| Co-NiS <sub>2</sub>                                    | 0.55                                                   | Angew. Chem. Int. Ed. 58 (2019) 18676       |
| RuNP@RuN <sub>x</sub> -OFC/NC                          | 0.49                                                   | Appl. Catal. B: Environ. 307 (2022) 121193  |
| MoNi <sub>4</sub> /MoO <sub>2</sub> @Ni                | 0.4                                                    | Nat. Commun. 8 (2017) 15437                 |
| Ru/NG-750                                              | 0.35                                                   | ACS Appl. Mater. Interfaces 9 (2017) 3785   |
| Ru/g-C <sub>3</sub> N <sub>4</sub> -C-TiO <sub>2</sub> | 0.28                                                   | ACS Appl. Mater. Interfaces 13 (2021) 46608 |
| Cu/BP                                                  | 0.275                                                  | Nature Commun. 13 (2022) 5496               |
| Ru@GnP                                                 | 0.26                                                   | Adv. Mater. 30 (2018) 1803676               |
| Pt@CoS                                                 | 0.131                                                  | Appl. Catal. B: Environ. 315 (2022) 121534  |
| Ni-MoS <sub>2</sub>                                    | 0.08                                                   | Energy & Environ. Sci. 9 (2016) 2789        |
| Ru-MoS <sub>2</sub> /CC                                | 0.062                                                  | Appl. Catal. B: Environ. 249 (2019) 91      |



**Table S8.** Comparison of TOF@ $\eta = 100$  mV between our catalyst and recently reported representative HER catalysts in acidic electrolyte.

| <b>Catalyst</b>                                    | <b>TOF@<math>\eta = 100</math> mV (s<sup>-1</sup>)</b> | <b>References</b>                    |
|----------------------------------------------------|--------------------------------------------------------|--------------------------------------|
| Pt–MoAl <sub>1-x</sub> B                           | 0.627                                                  | This work                            |
| CoN <sub>x</sub> /C                                | 0.41                                                   | PNAS 115 (2018) 12692                |
| CoN <sub>x</sub> /C                                | 0.39                                                   | Nat. Commun. 6 (2015) 7992           |
| Co-NG-MW                                           | 0.385                                                  | Adv. Mater. 30 (2018) 1802146        |
| Co-NC                                              | 0.36                                                   | Nano Res. 15 (2022) 3913             |
| Ru@GnP                                             | 0.26                                                   | Adv. Mater. 30 (2018) 1803676        |
| Mo <sub>1-x</sub> V <sub>x</sub> Se <sub>2</sub>   | 0.25                                                   | ACS Nano 15 (2021) 14672             |
| Ni-Mo <sub>2</sub> C/GNS                           | ~0.24                                                  | J. Catal. 388 (2020) 122             |
| MoS <sub>2</sub> /Ni <sub>2</sub> O <sub>3</sub> H | 0.14                                                   | Small 16 (2020) 2002212              |
| MoP S                                              | 0.12                                                   | Small Methods 6 (2022) 2200295       |
| Ni <sub>2</sub> P                                  | 0.064                                                  | Energy Environ. Sci. 8 (2015) 1027   |
| CoP NPs                                            | 0.046                                                  | Angew. Chem. Int. Ed. 53 (2014) 5427 |

**Table S9.** Comparison of performance between our developed AEMWE single cell and recent reports.

| Catalyst                                                                                                         | Cell voltage (V) | Current density (A cm <sup>-2</sup> ) | Electrolyte and temperature                 | References                               |
|------------------------------------------------------------------------------------------------------------------|------------------|---------------------------------------|---------------------------------------------|------------------------------------------|
| Pt–MoAl <sub>1-x</sub> B <sub>(-)</sub> //RuO <sub>2(+)</sub>                                                    | 1.85             | 0.5                                   | 1.0 M KOH and 60 °C                         | This work                                |
| Pt–MoAl <sub>1-x</sub> B <sub>(-)</sub> //RuO <sub>2(+)</sub>                                                    | 2.0              | 1.0                                   | 1.0 M KOH and 60 °C                         | This work                                |
| Ni/(CeO <sub>2</sub> -La <sub>2</sub> O <sub>3</sub> )/C <sub>(-)</sub><br>//CuCoO <sub>x(+)</sub>               | 1.9              | 0.47                                  | 1% K <sub>2</sub> CO <sub>3</sub> and 43 °C | Angew. Chem. Int. Ed. 53 (2014) 1378     |
| Ni/(CeO <sub>2</sub> -La <sub>2</sub> O <sub>3</sub> )/C <sub>(-)</sub><br>//CuCoO <sub>x(+)</sub>               | 1.95             | 0.5                                   | 1% K <sub>2</sub> CO <sub>3</sub> and 60 °C | Int. J. Hydrogen Energy, 42 (2017) 10752 |
| NiCoO-NiCo/C <sub>(-)</sub> //CuCoO                                                                              | 1.85             | 0.504                                 | 1.0 M KOH and 50 °C                         | Appl Catal B Environ. 292 (2021) 120170  |
| Co <sub>3</sub> S <sub>4</sub> NS/NF <sub>(-)</sub><br>//Cu <sub>0.81</sub> Co <sub>2.19</sub> O <sub>4(+)</sub> | 2.0              | 0.431                                 | 1.0 M KOH and 45–48 °C                      | Int. J. Hydrogen Energy 45 (2020) 36     |
| Pt/KB 40% <sub>(-)</sub> //NiMn <sub>2</sub> O <sub>4(+)</sub>                                                   | 2.0              | 0.53                                  | 1.0 M KOH and 80 °C                         | Int. J. Hydrogen Energy 45 (2020) 9285   |
| Platinum black <sub>(-)</sub><br>//NiCoFeO <sub>x(+)</sub>                                                       | 2.29<br>2.492    | 0.5<br>1                              | 1.0 M KOH and 50 °C                         | ACS Catal. 9 (2019) 7                    |
| Ag nanoparticle <sub>(-)</sub><br>//NiFeCr-LDH <sub>(+)</sub>                                                    | 2.11             | 1                                     | 1.0 M KOH and 40 °C                         | Small 18 (2022) 2200303                  |
| Pt/C <sub>(-)</sub> //CoSb <sub>2</sub> O <sub>6(+)</sub>                                                        | 1.9              | 0.8                                   | 1.0 M KOH and 60 °C                         | ACS Energy Lett. 6 (2021) 364            |
| Pt/C <sub>(-)</sub> //NiCoFe–NDA <sub>(+)</sub>                                                                  | 1.8<br>2.0       | 0.325<br>~0.55                        | 1.0 M KOH and 50 °C                         | Energy Environ. Sci. 14 (2021) 6546      |
| Raney Ni <sub>(-)</sub> //NiFe LDH/NiS <sub>(+)</sub>                                                            | 2.01             | 0.4                                   | 30% KOH and 80–85°C                         | Adv. Energy Mater. 11 (2021) 2102353     |
| Ni foam <sub>(-)</sub> //NiFe LDH/NiS <sub>(+)</sub>                                                             | 2.27             | 1                                     |                                             |                                          |
| Ni-Co-S/CP <sub>(-)</sub> //IrO <sub>2</sub> /CP <sub>(+)</sub>                                                  | 2.4              | 1.7                                   | 1.0 M KOH                                   | Int. J. Energy                           |

|                                                                                                                           |      |      |                        |                                               |
|---------------------------------------------------------------------------------------------------------------------------|------|------|------------------------|-----------------------------------------------|
|                                                                                                                           |      |      | and 50 °C              | Res. 45 (2021) 1918                           |
| Cu–Co–P/CP <sub>(-)</sub> //IrO <sub>2</sub> /CP <sub>(+)</sub>                                                           | 1.9  | 0.7  | 1.0 M KOH<br>and 50 °C | Int. J. Hydrog.<br>Energy 46 (2021) 19789     |
| NiMo/Nickel felt <sub>(-)</sub><br>//NiFe/Nickel felt <sub>(+)</sub>                                                      | 1.91 | 0.6  | 1.0 M KOH<br>and 80 °C | J. Membrane Sci. 633<br>(2021) 119418         |
| Pt mesh <sub>(-)</sub> //S-<br>FeOOH <sub>+1000</sub> /IF <sub>(+)</sub>                                                  | 2.12 | 1    | 1.0 M KOH<br>and 25 °C | Appl. Catal. B: Environ.<br>315 (2022) 121571 |
| MoO <sub>2</sub> /Ni <sub>(-)</sub> //Ni foam <sub>(+)</sub>                                                              | 2.0  | 0.55 | 1.0 M KOH<br>and 60 °C | J. Mater. Chem. A 11<br>(2023) 5789           |
| NiFe <sub>2</sub> O <sub>4</sub> /stainless-steel<br>fiber paper <sub>(-)</sub> //NiFeCO/Ni<br>fiber paper <sub>(+)</sub> | 2.2  | 0.88 | 1.0 M KOH<br>and 50 °C | J. Mater. Chem. A 10<br>(2022) 8401           |

## References

1. Park, Y. S. *et al.* Commercial anion exchange membrane water electrolyzer stack through non-precious metal electrocatalysts. *Appl Catal B* **292**, 120170 (2021).
2. King, L. A. *et al.* A non-precious metal hydrogen catalyst in a commercial polymer electrolyte membrane electrolyser. *Nat Nanotechnol* **14**, 1071–1074 (2019).
3. Kresse, G. & Furthmüller, J. Efficiency of ab-initio total energy calculations for metals and semiconductors using a plane-wave basis set. *Comput Mater Sci* **6**, 15–50 (1996).
4. Kresse, G. & Furthmüller, J. Efficient iterative schemes for ab initio total-energy calculations using a plane-wave basis set. *Phys Rev B* **54**, 11169–11186 (1996).
5. Kresse, G. & Joubert, D. From ultrasoft pseudopotentials to the projector augmented-wave method. *Phys Rev B* **59**, 1758–1775 (1999).
6. Perdew, J. P. *et al.* Generalized Gradient Approximation Made Simple. *Phys Rev Lett* **77**, 3865–3868 (1996).
7. Wang, V. *et al.* VASPKIT: A user-friendly interface facilitating high-throughput computing and analysis using VASP code. *Comput Phys Commun* **267**, 108033 (2021).
8. Grimme, S., Antony, J., Ehrlich, S. & Krieg, H. A consistent and accurate ab initio parametrization of density functional dispersion correction (DFT-D) for the 94 elements H-Pu. *J Chem Phys* **132**, 154104 (2010).
9. Nguyen, T. H. *et al.* Metal Single-Site Molecular Complex–MXene Heteroelectrocatalysts Interspersed Graphene Nanonetwork for Efficient Dual-Task of Water Splitting and Metal–Air Batteries. *Adv Funct Mater* **33**, 2210101 (2023).
10. Chang, K. *et al.* A 3D hierarchical network derived from 2D Fe-doped NiSe nanosheets/carbon nanotubes with enhanced OER performance for overall water splitting. *J Mater Chem A* **10**, 3102–3111 (2022).
